# Supplementary material
Source: Research Square preprint supplement (doi:10.21203/rs.3.rs-8549358/v1)

**Fig.1 C**

ΔNp63α


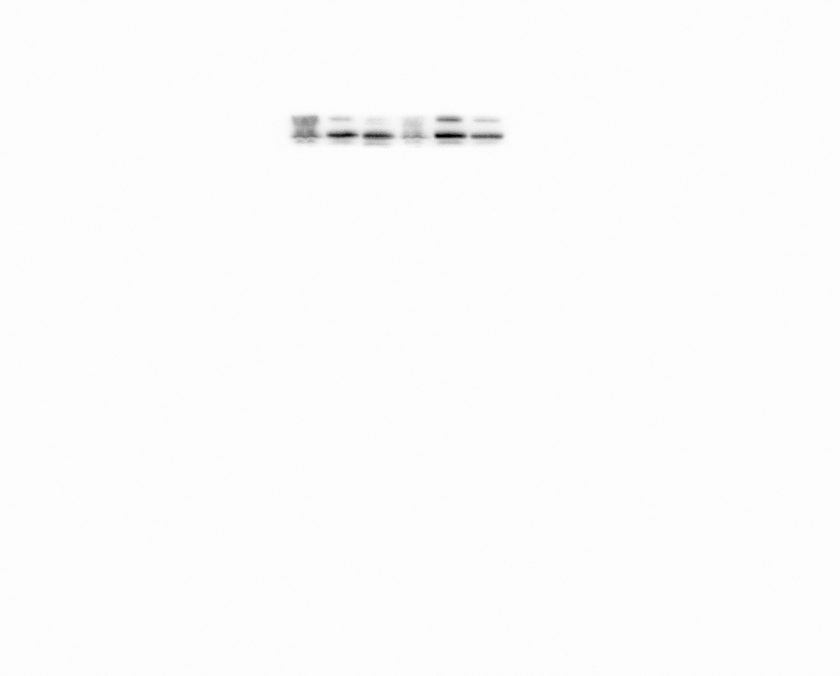


GAPDH


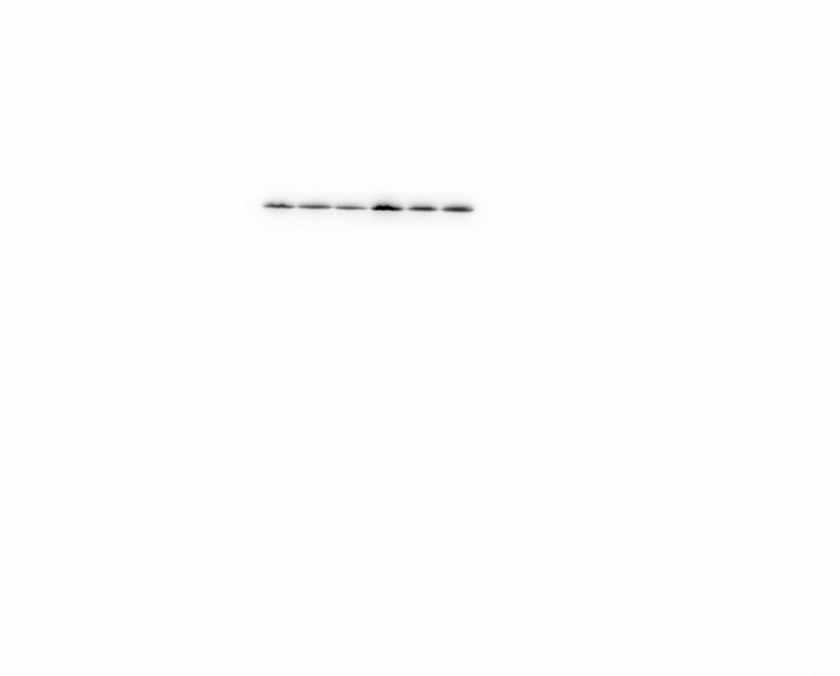


ΔNp63γ


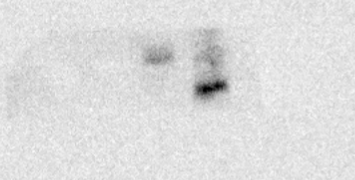


GAPDH


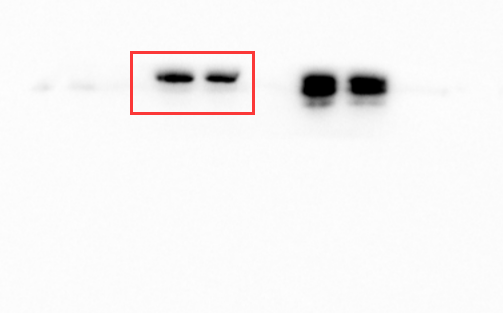


ΔNp63α


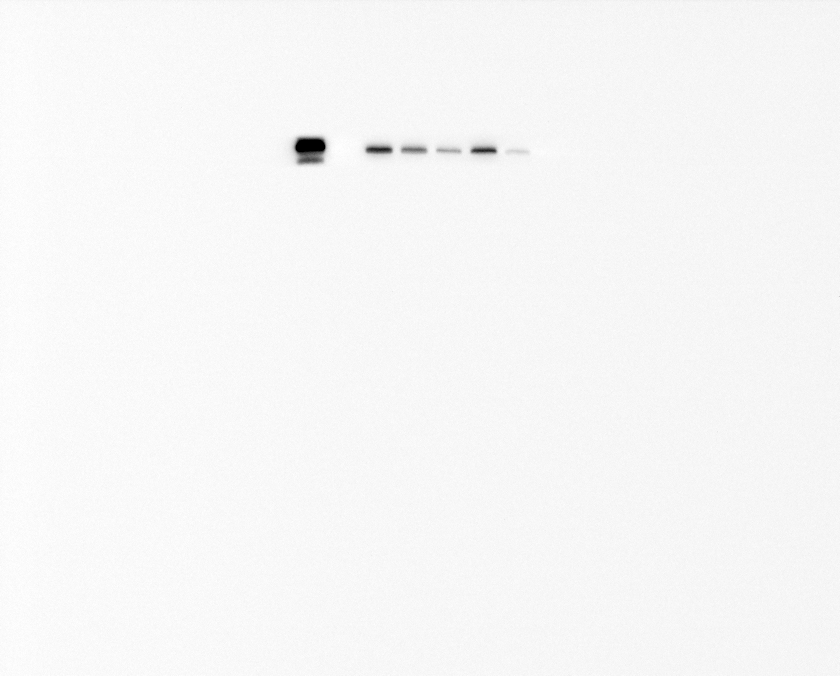


GAPDH


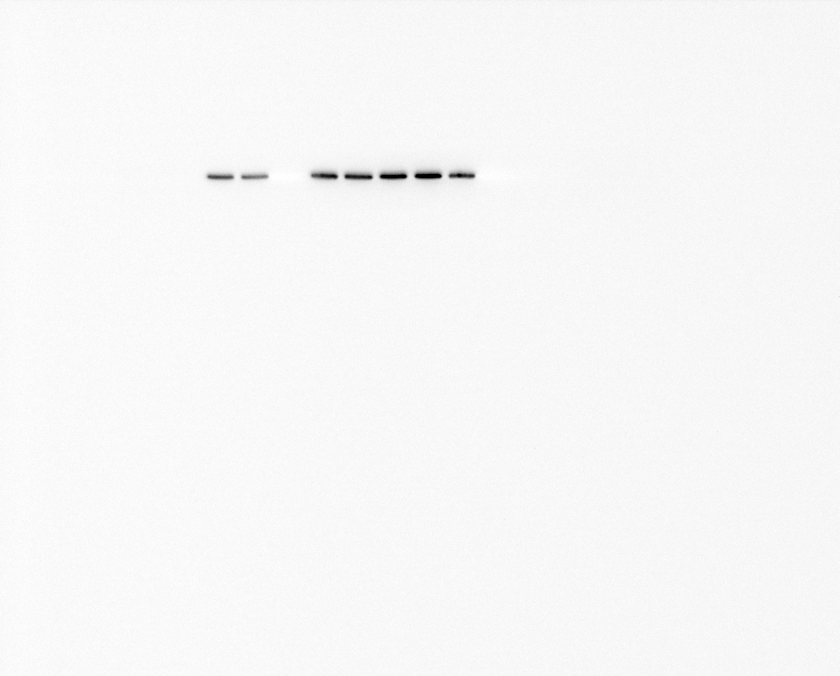


**Fig.1 D**

ΔNp63γ


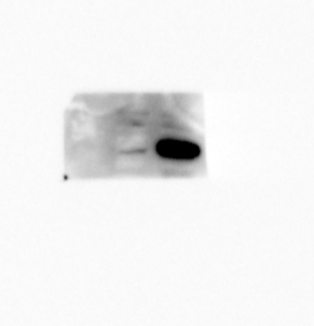


GAPDH


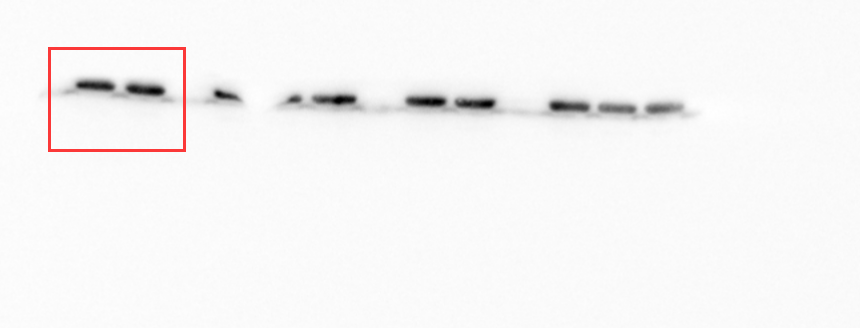


**Fig.1 E**

ΔNp63α


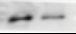


GAPDH


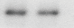


ΔNp63α


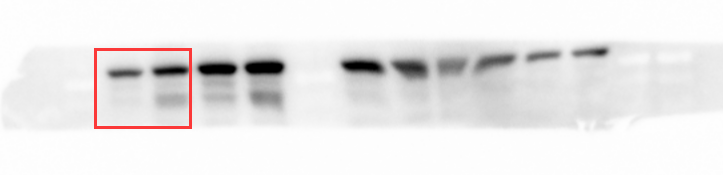


GAPDH


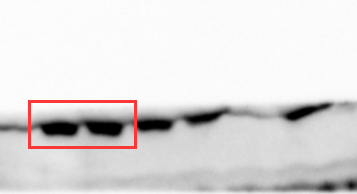


**Fig.1 I**

ΔNp63α


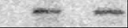


GAPDH


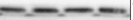


**Fig.1 J**

ΔNp63α


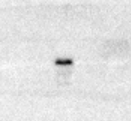


ΔNp63α


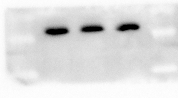


H1


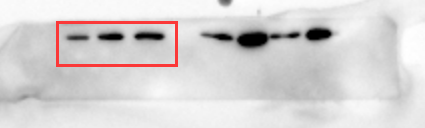


ΔNp63γ


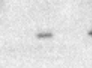


ΔNp63γ


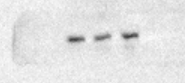


H1


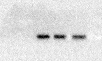


**Fig.3 A**

ΔNp63α


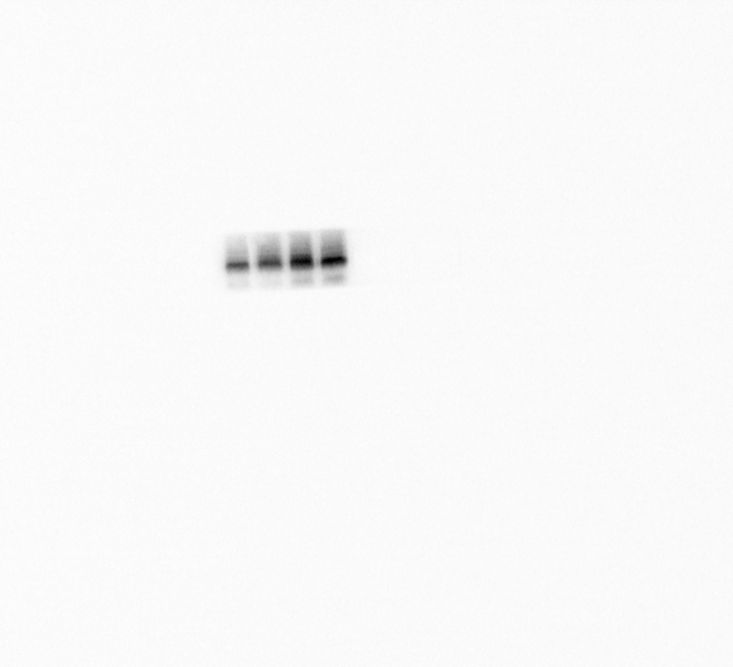


GAPDH


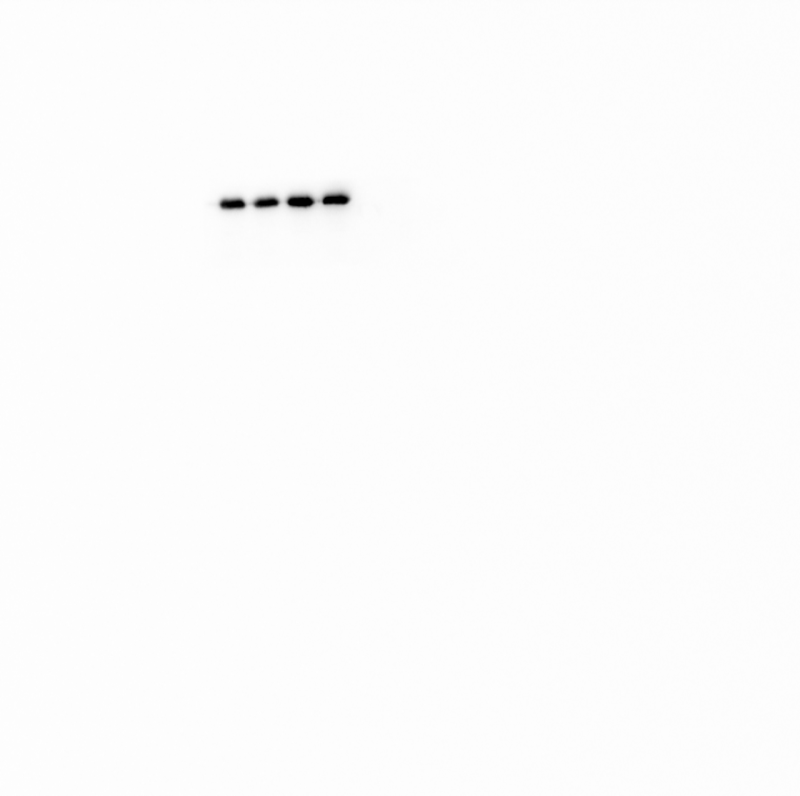


**Fig.3 D**

ΔNp63α


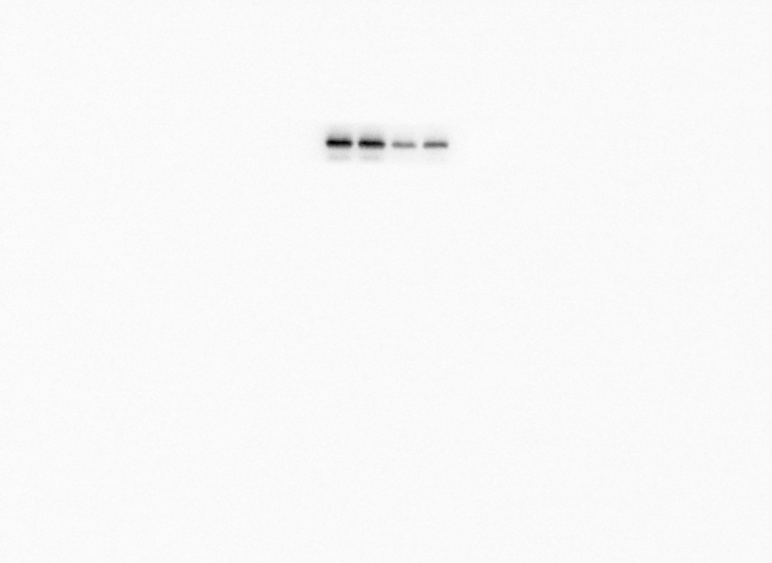


GAPDH


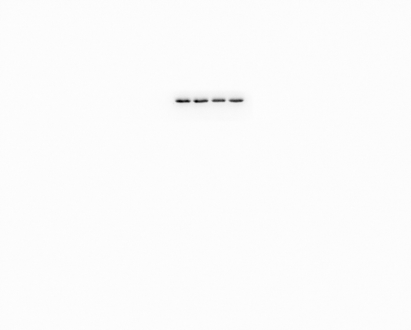


**Fig.3 G**

ΔNp63α


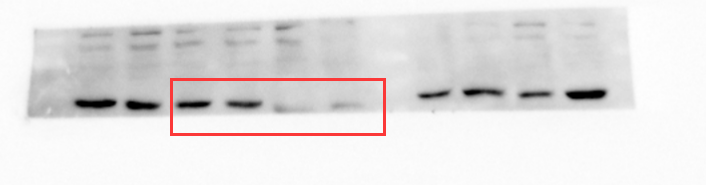


GAPDH
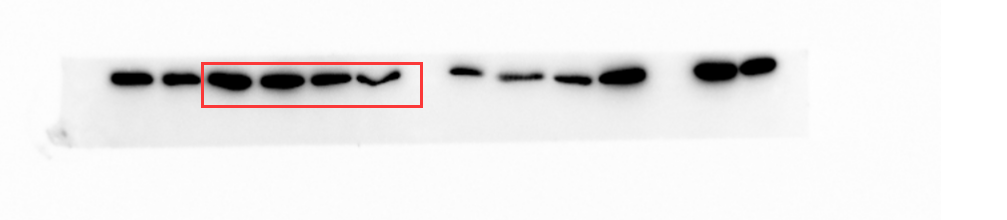


**Fig.4 A**

P-ERK


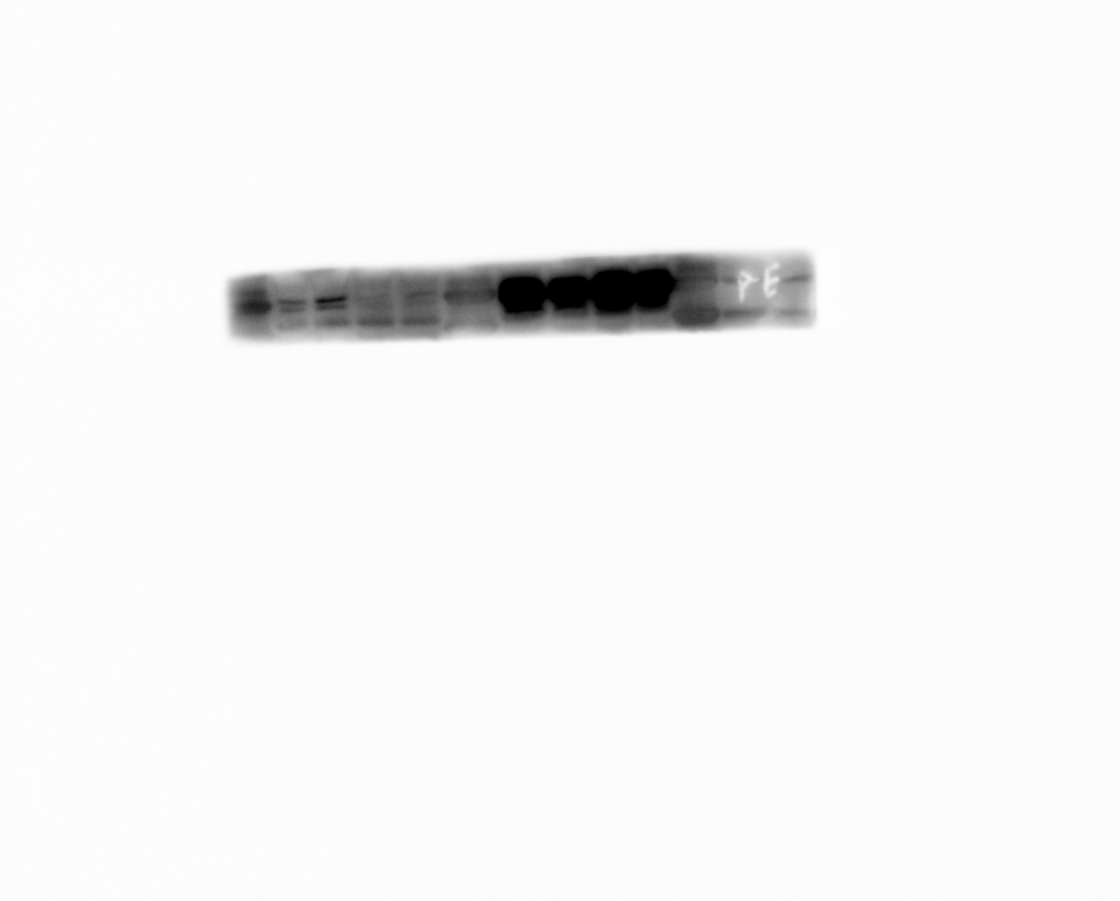


ERK


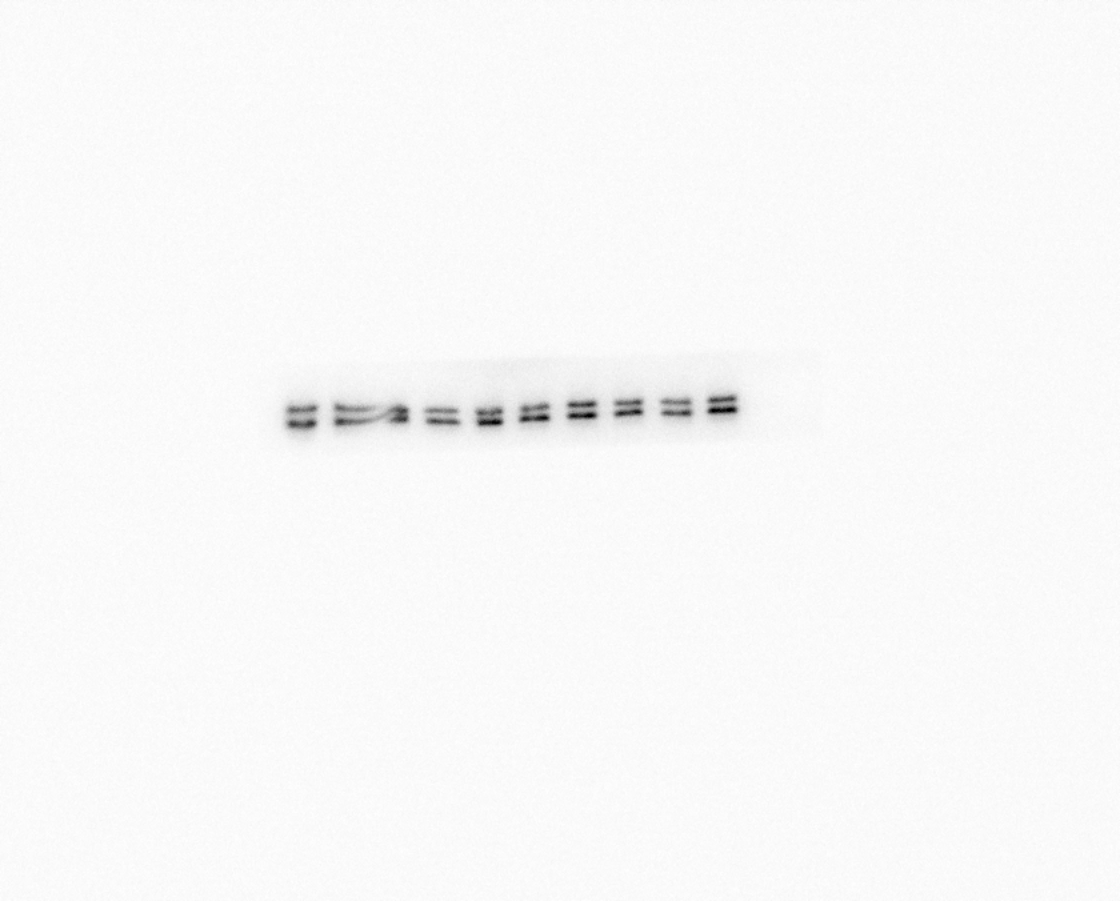


GAPDH


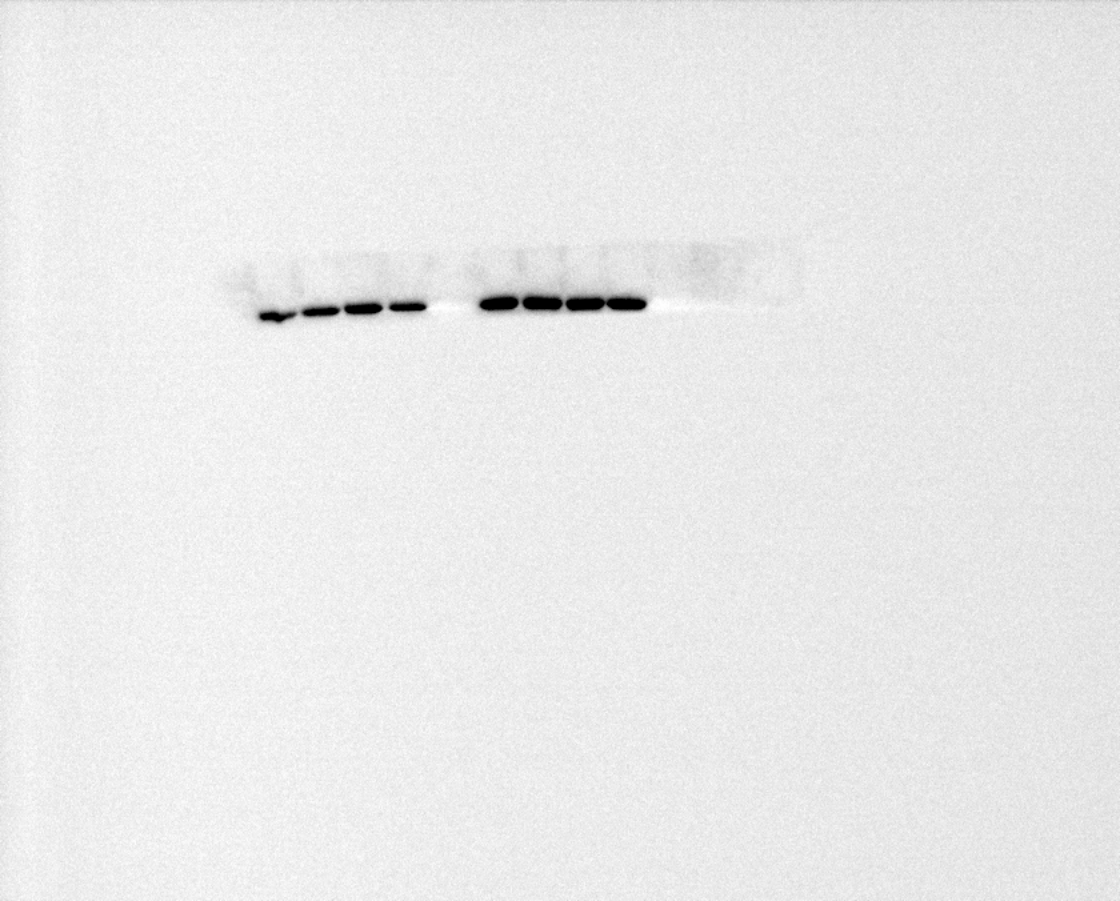


**Fig.4 C**

ΔNp63α


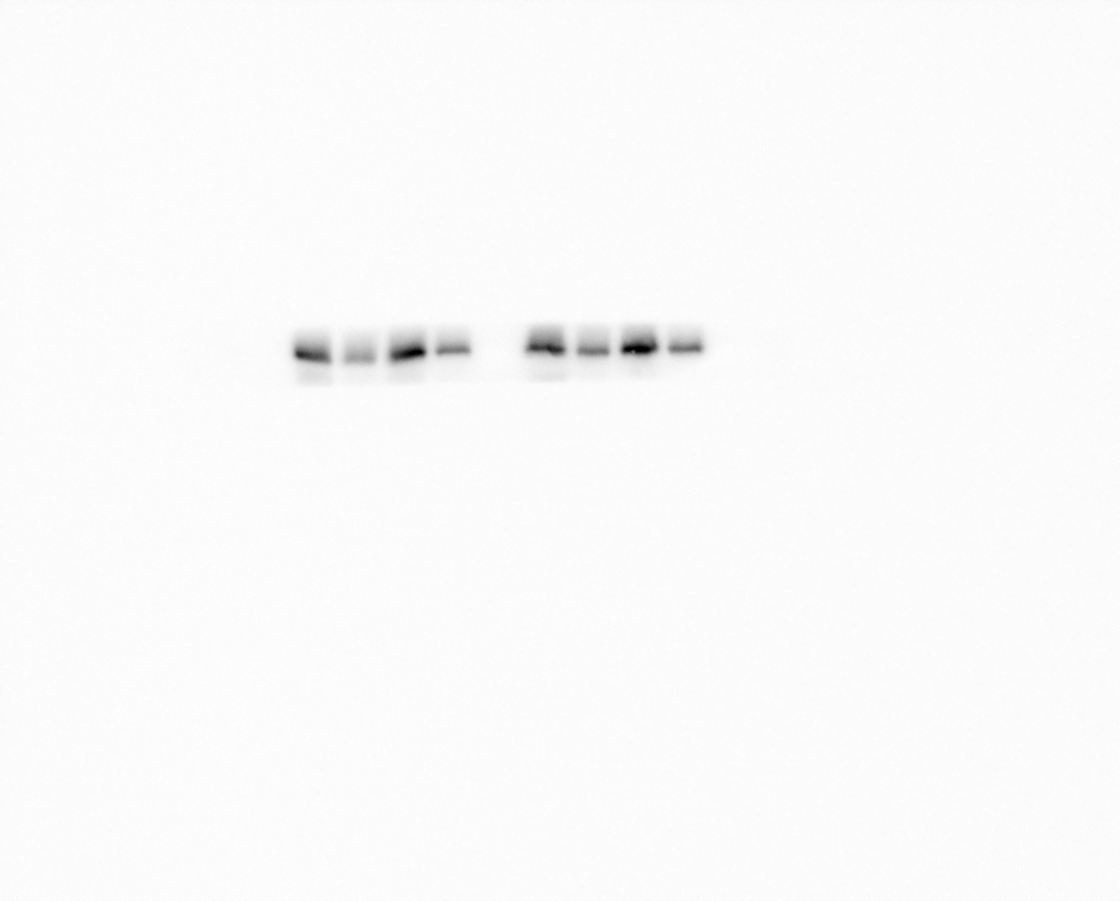


P-ERK


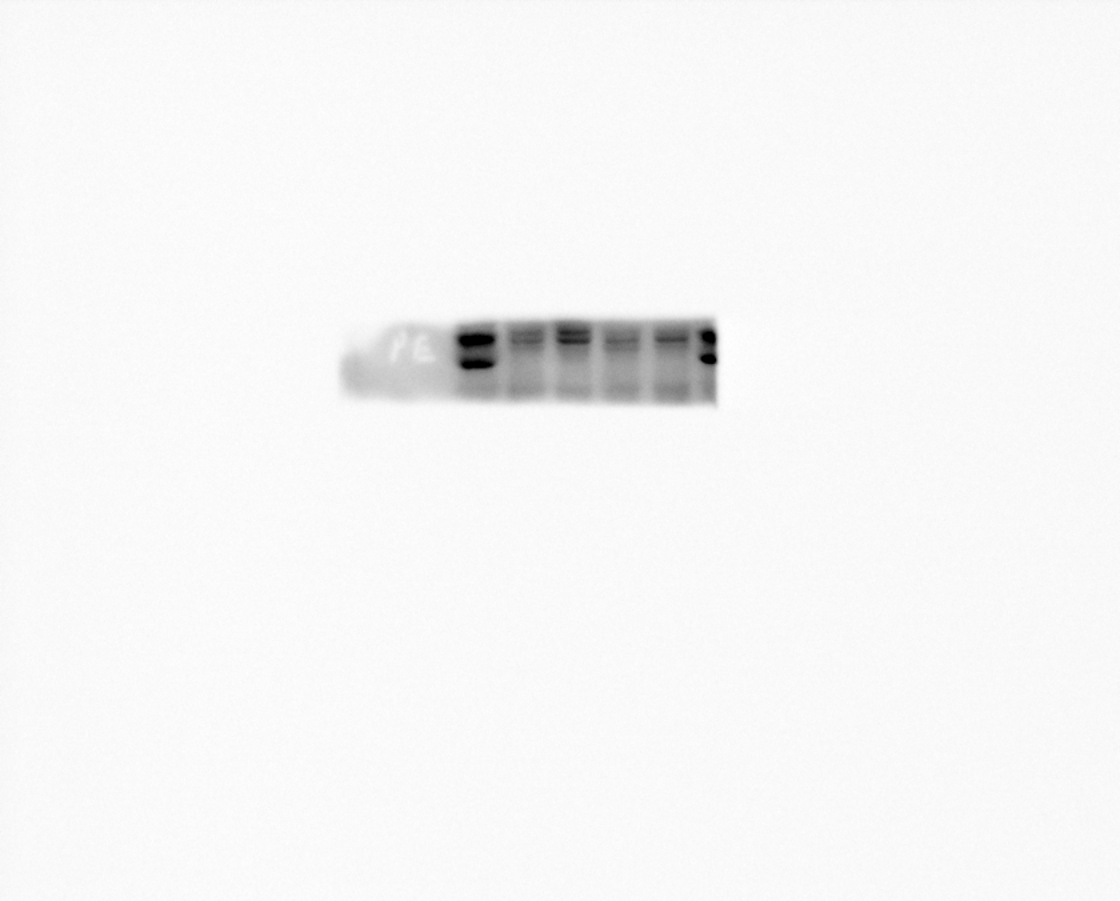


ERK


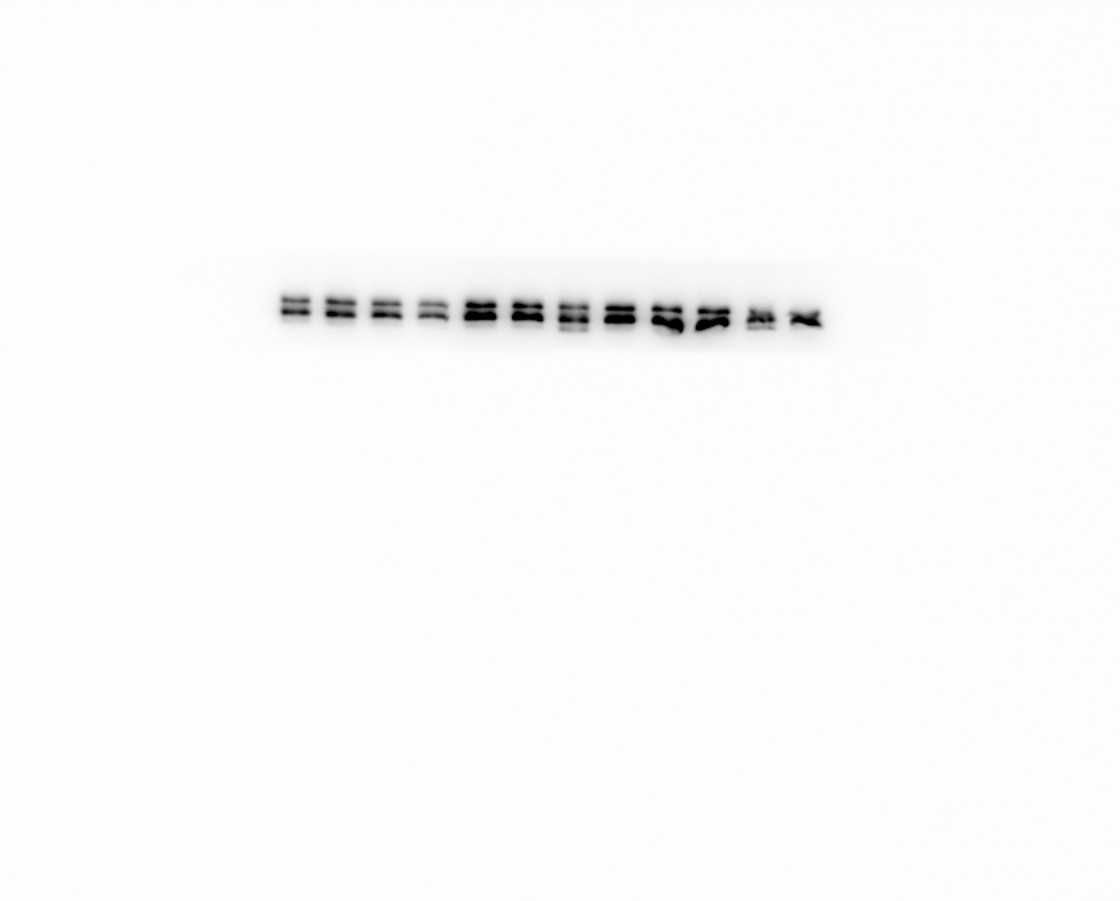


GAPDH


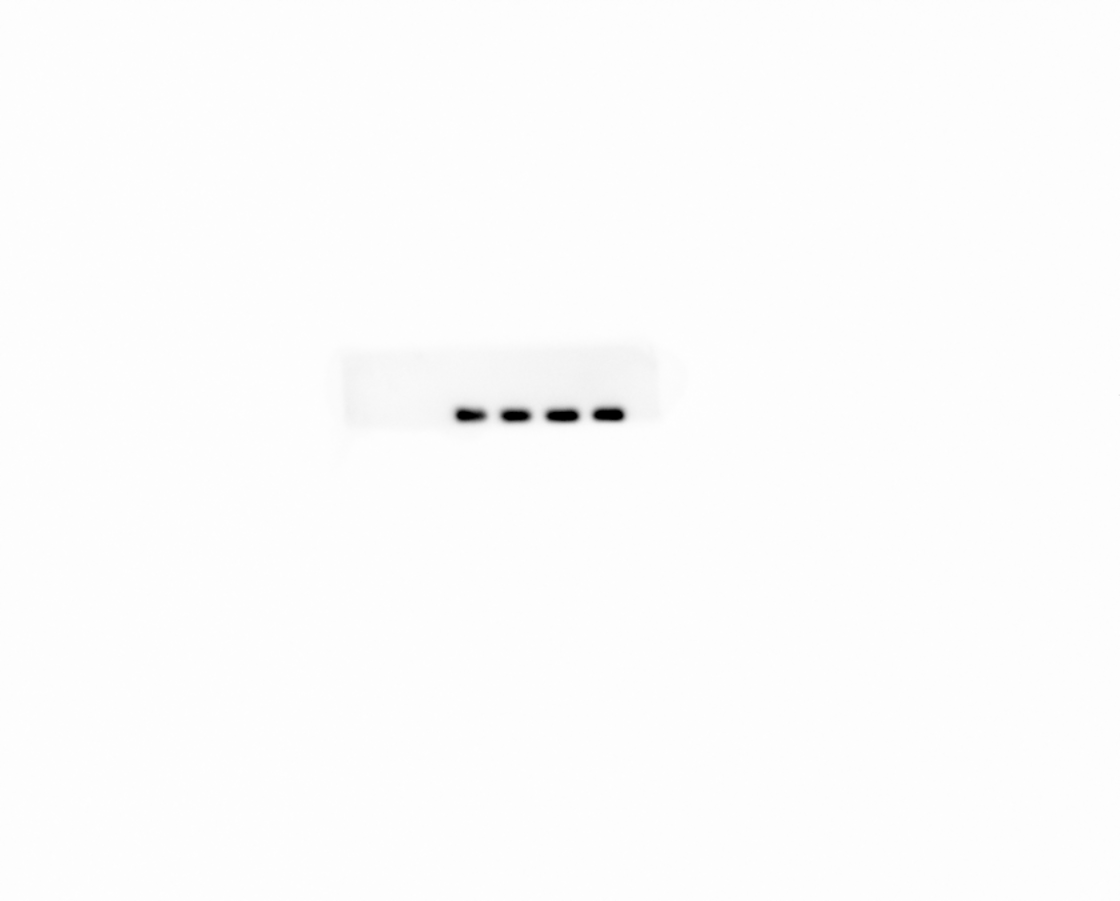


**Fig.4 E**

ΔNp63α


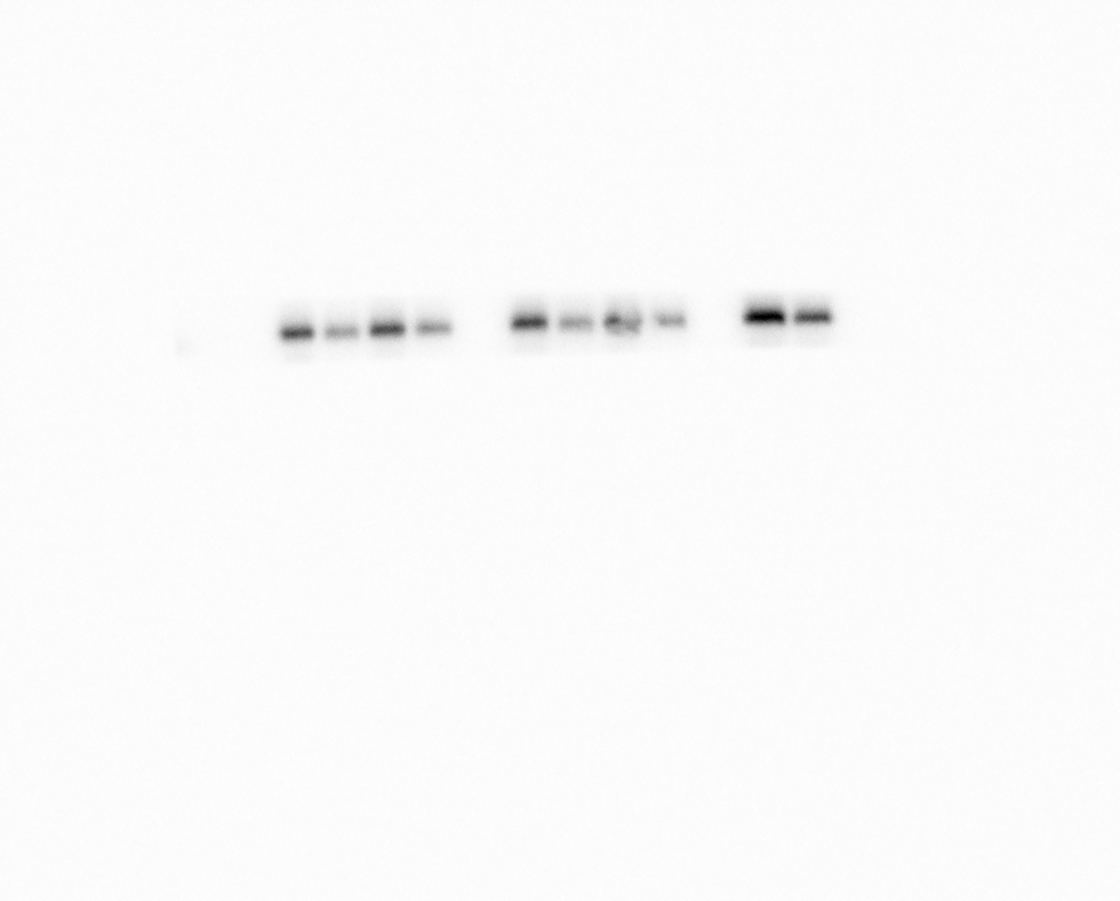


P-ERK


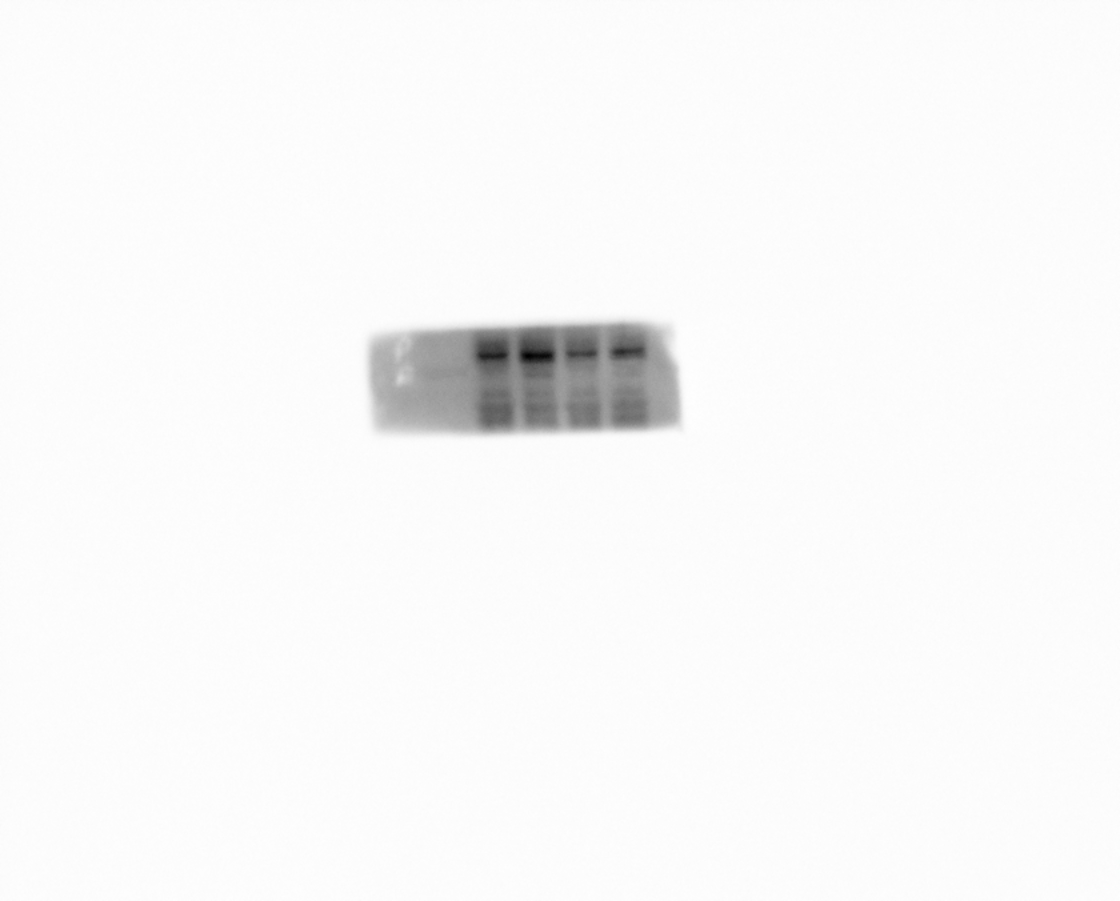


ERK


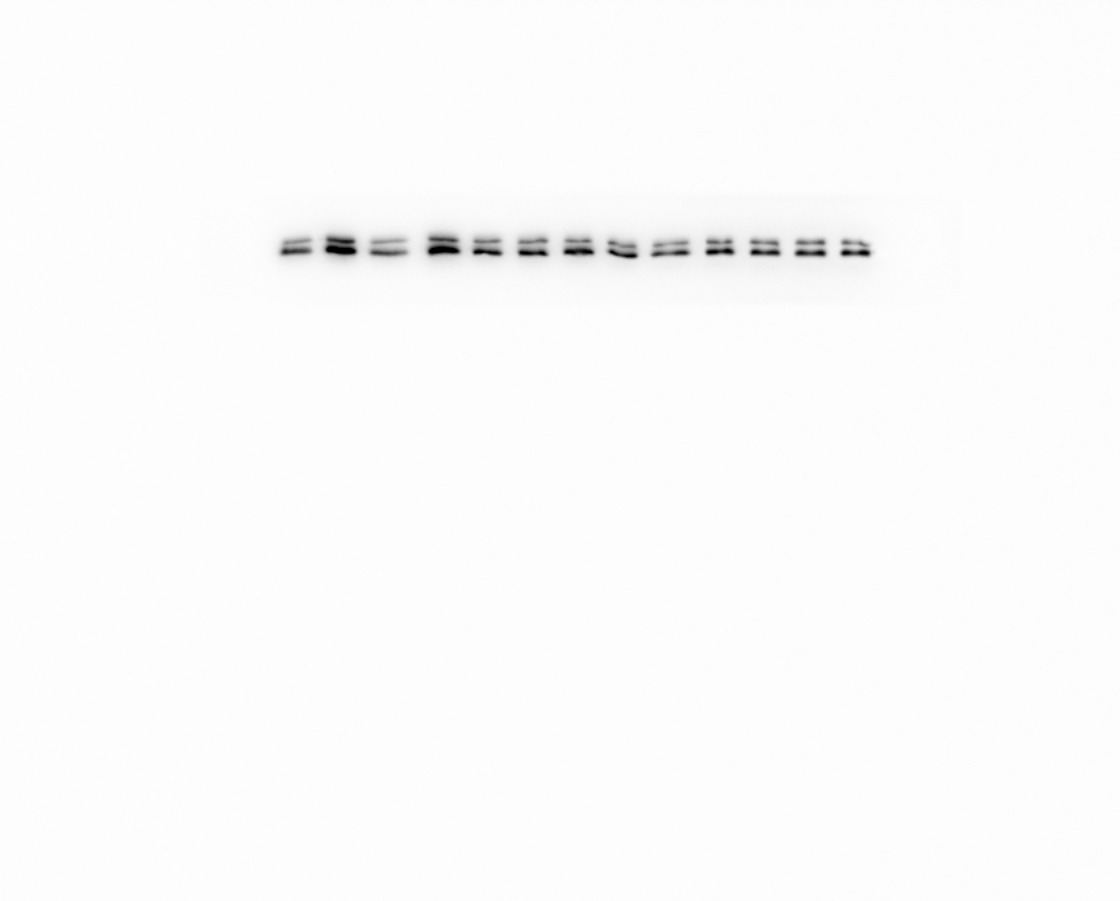


GAPDH


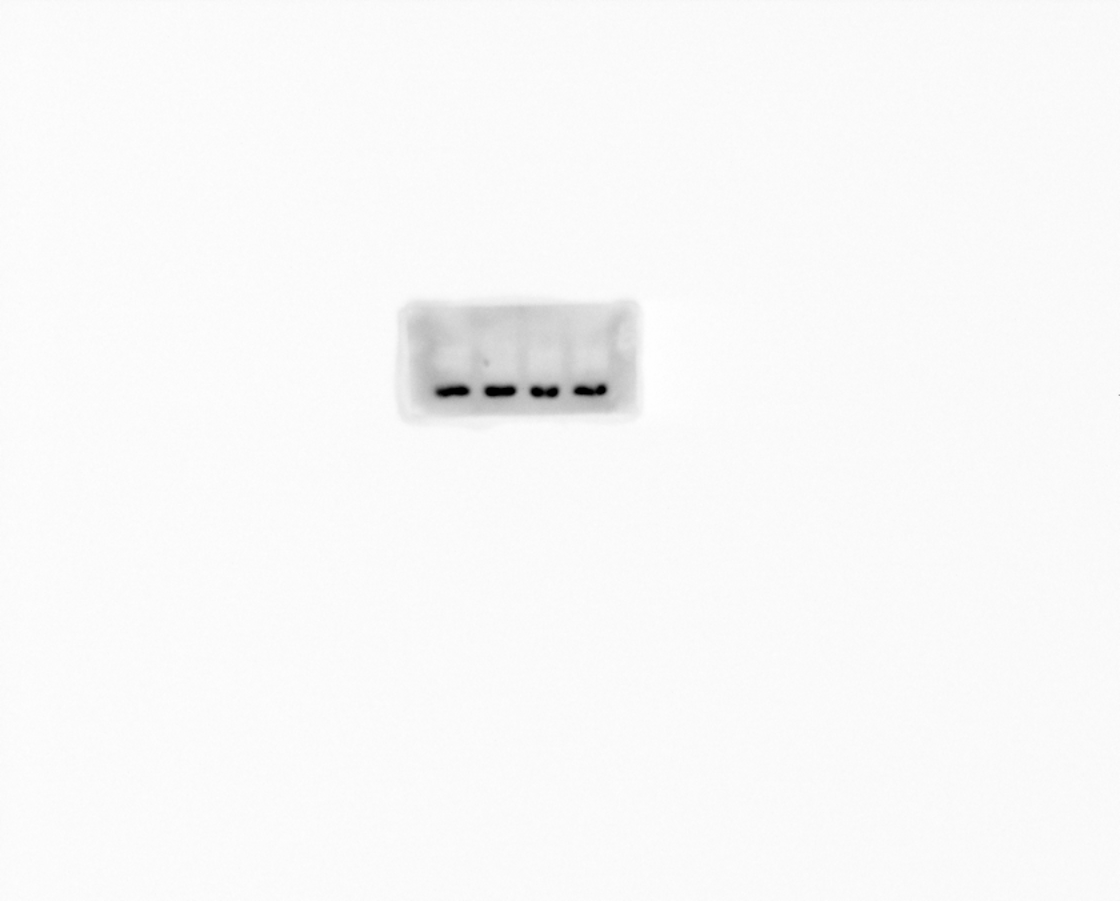


**Fig.5 C**

AKT


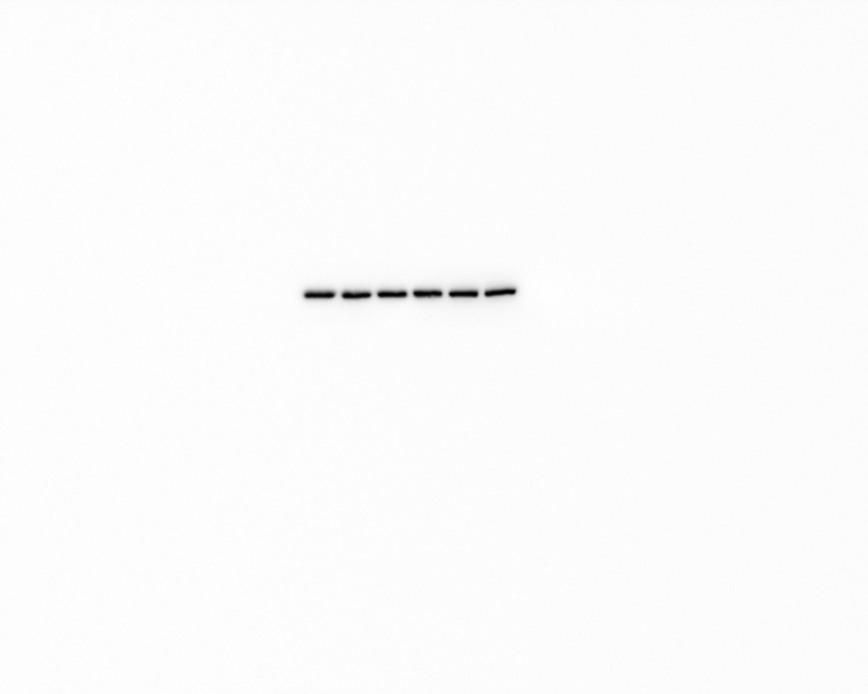


p-AKT


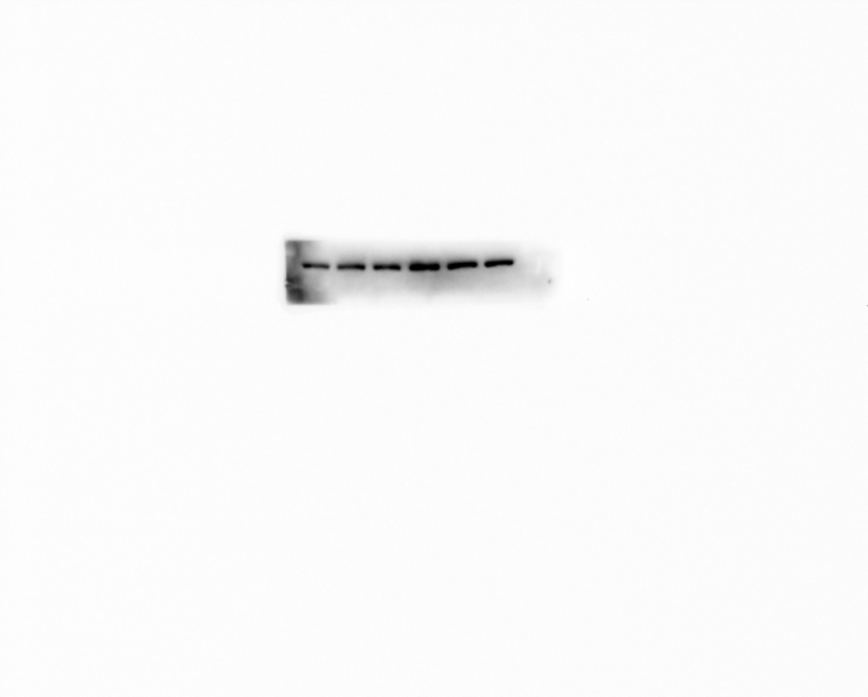


mTOR


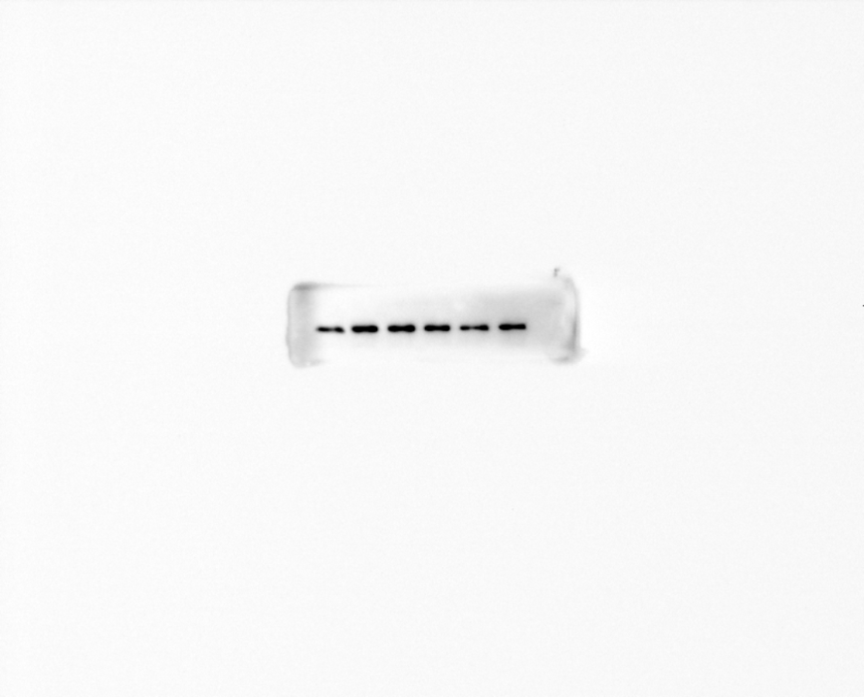


P-mTOR


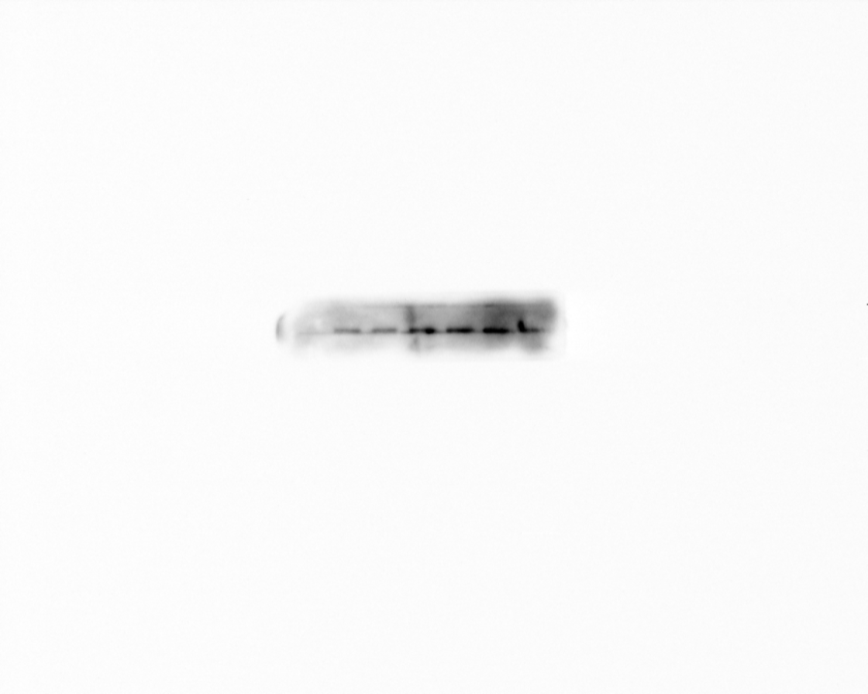


ERK


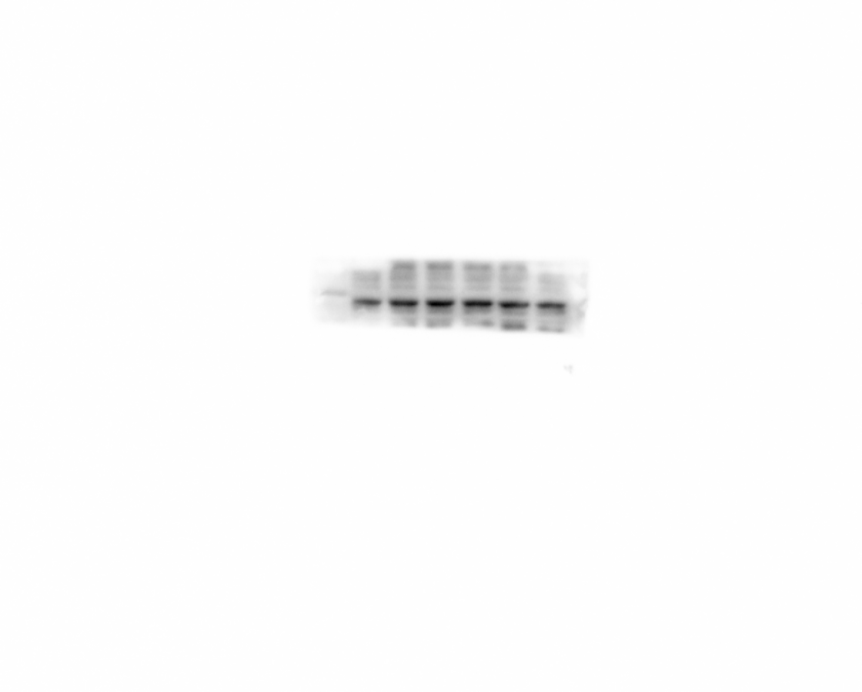


P-ERK


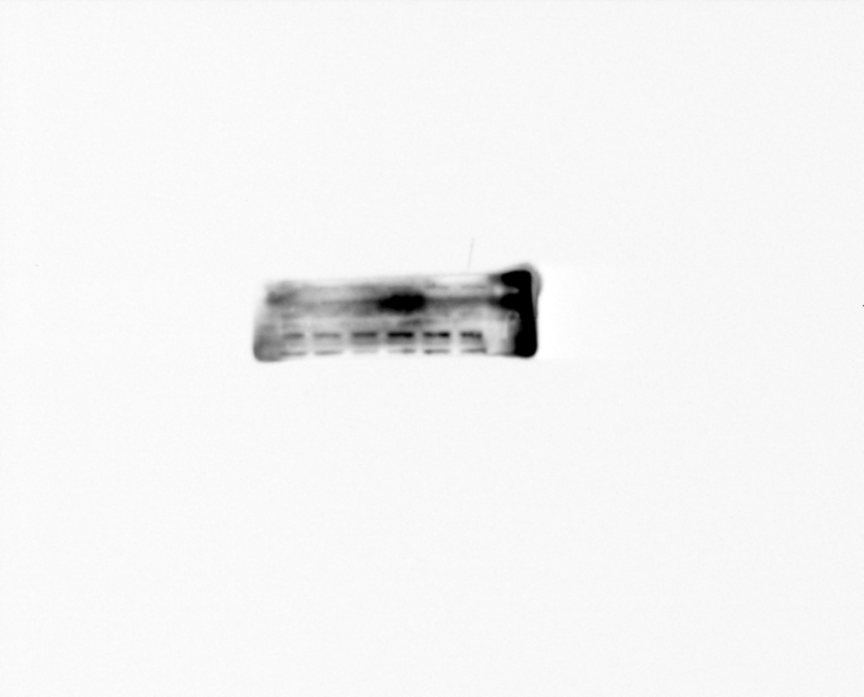


S6K


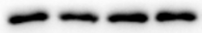


P-S6K


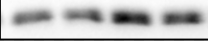


GAPDH


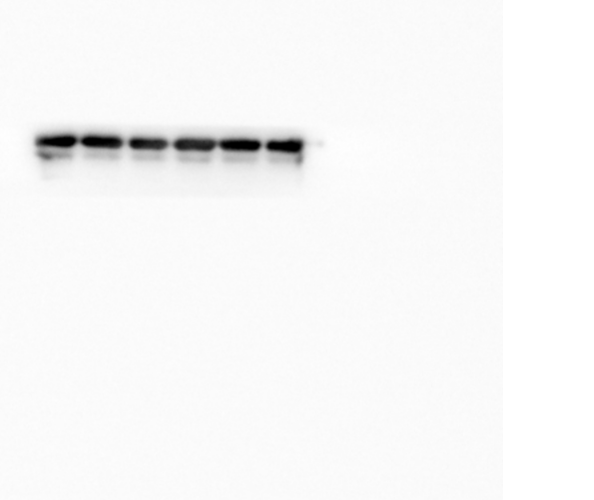


**Fig.6 G**

GAPDH


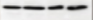


ERK P-ERK


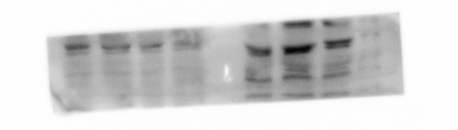


p-STAT3


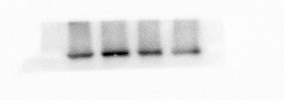


STAT3


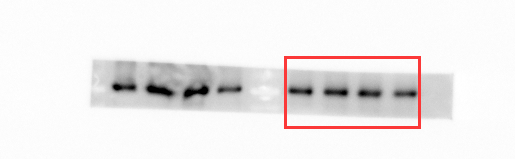


**Fig.S1 A**

P63


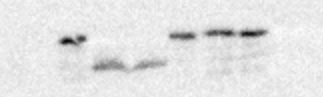


GAPDH


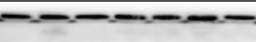


**Fig.S1 B**

ΔNp63α


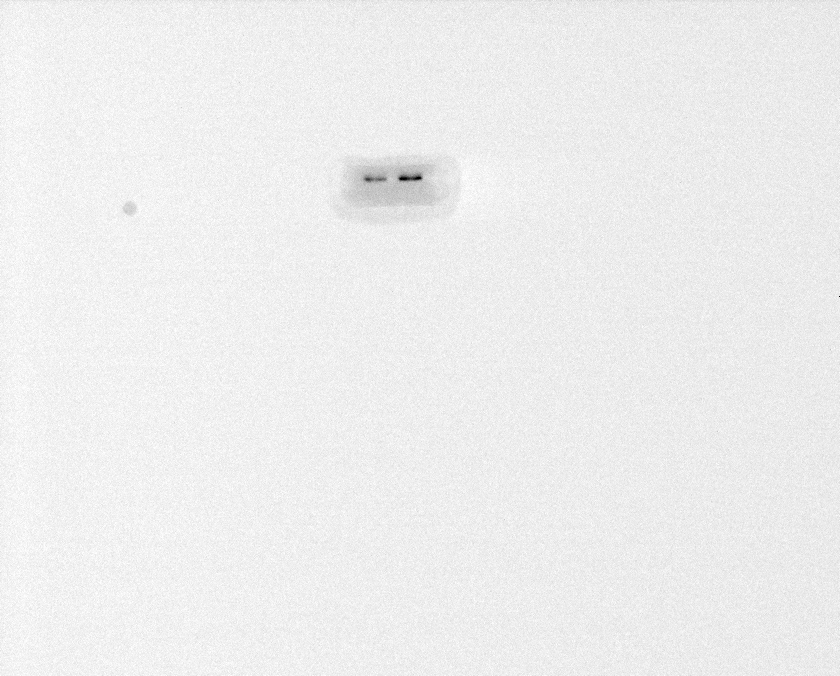


GAPDH


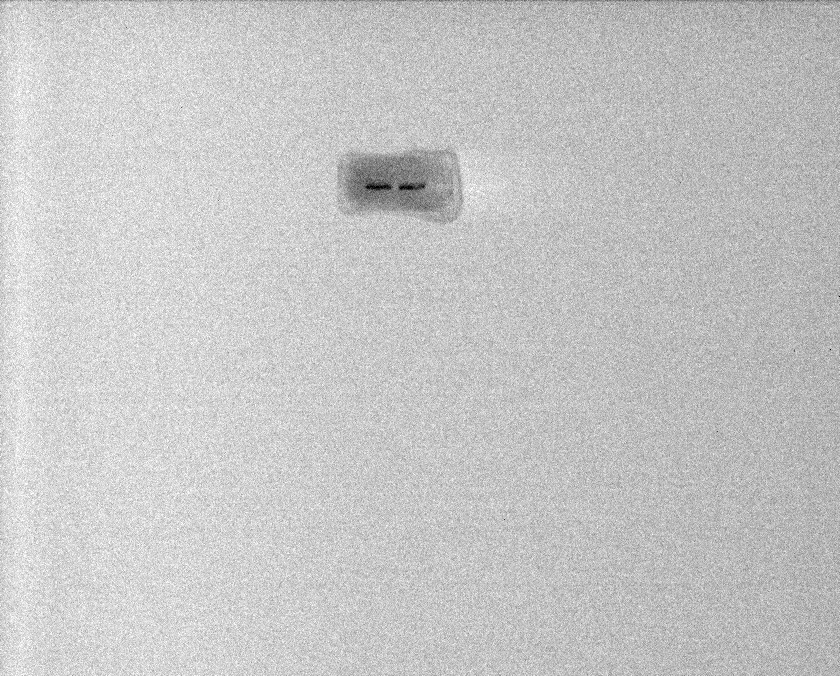


**Fig.S1 C**

ΔNp63α


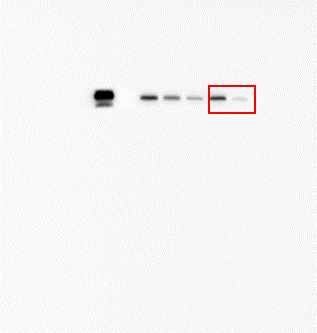


GAPDH


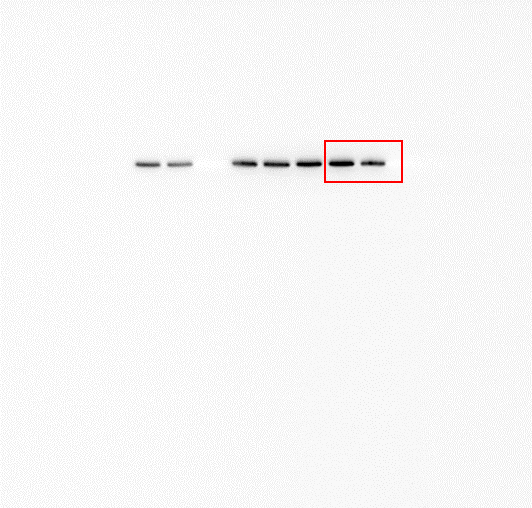


**Fig.S1 D**

ΔNp63α


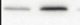


GAPDH


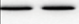


ΔNp63α


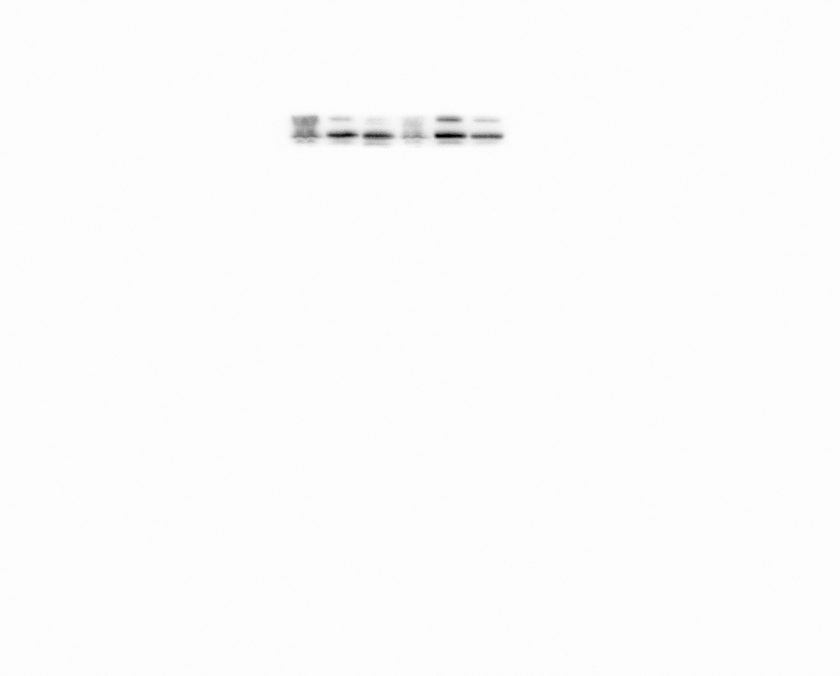


GAPDH


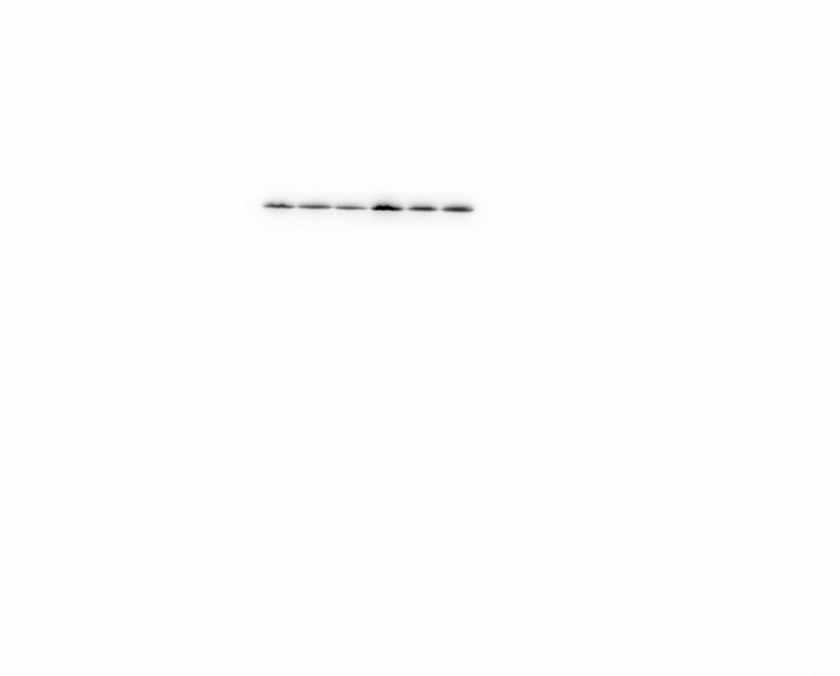


**Fig.S1 E**

ΔNp63γ


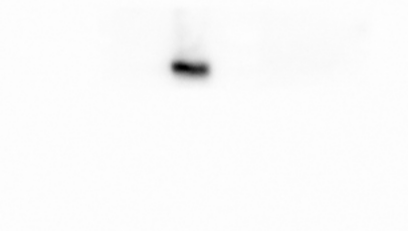


GAPDH


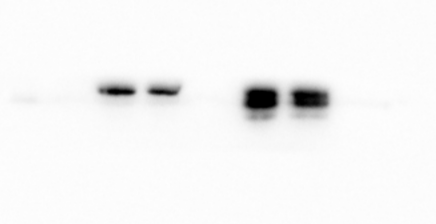


**Fig.S5 A**

ΔNp63α


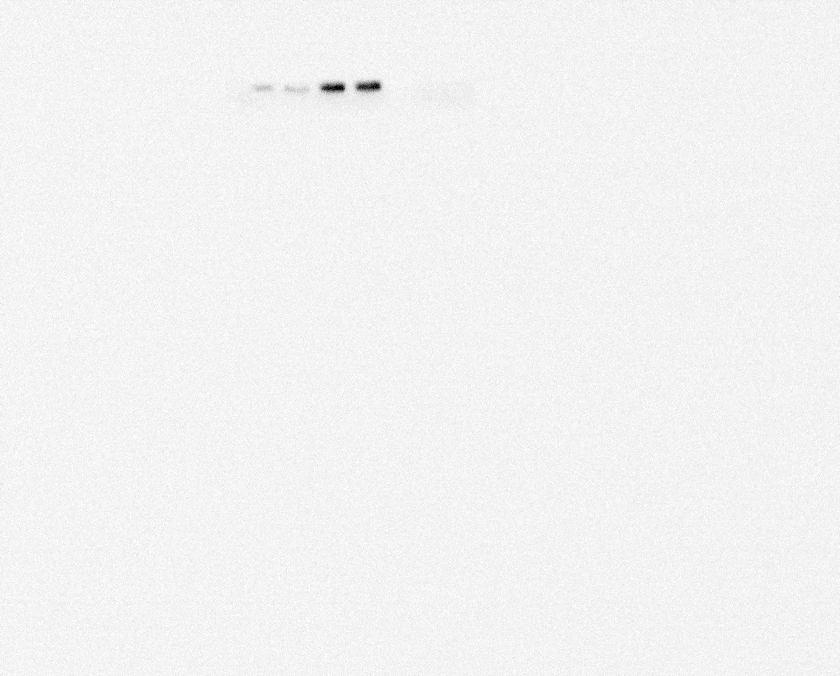


GAPDH


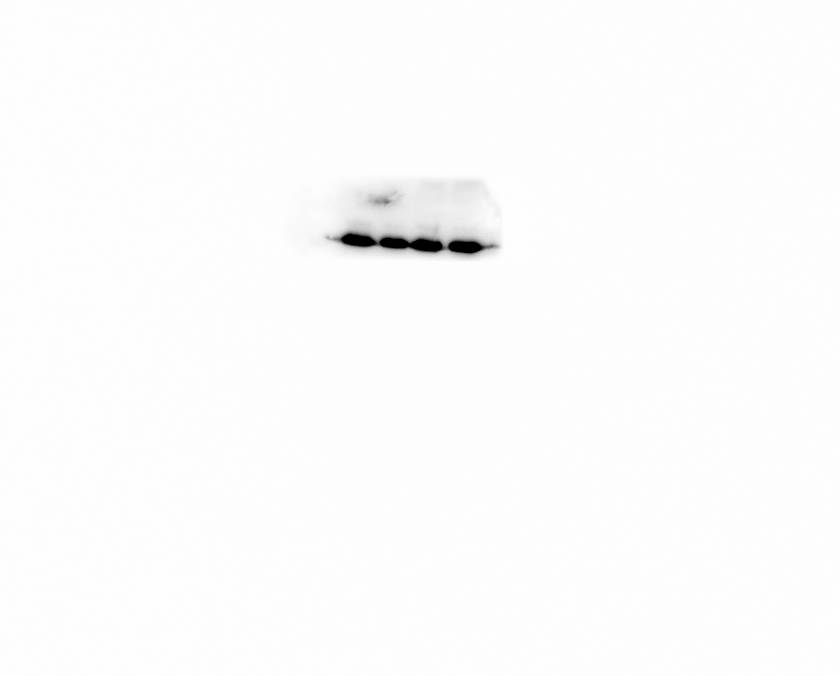


**Fig.S5 D**

ΔNp63α


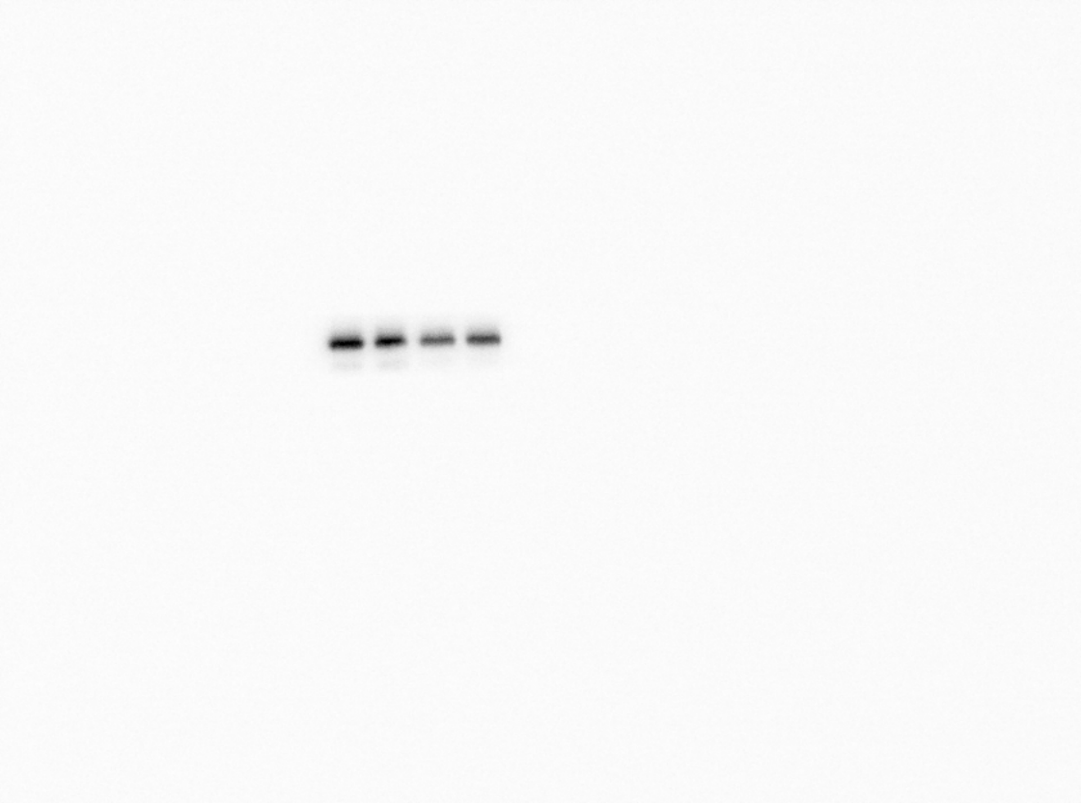


GAPDH


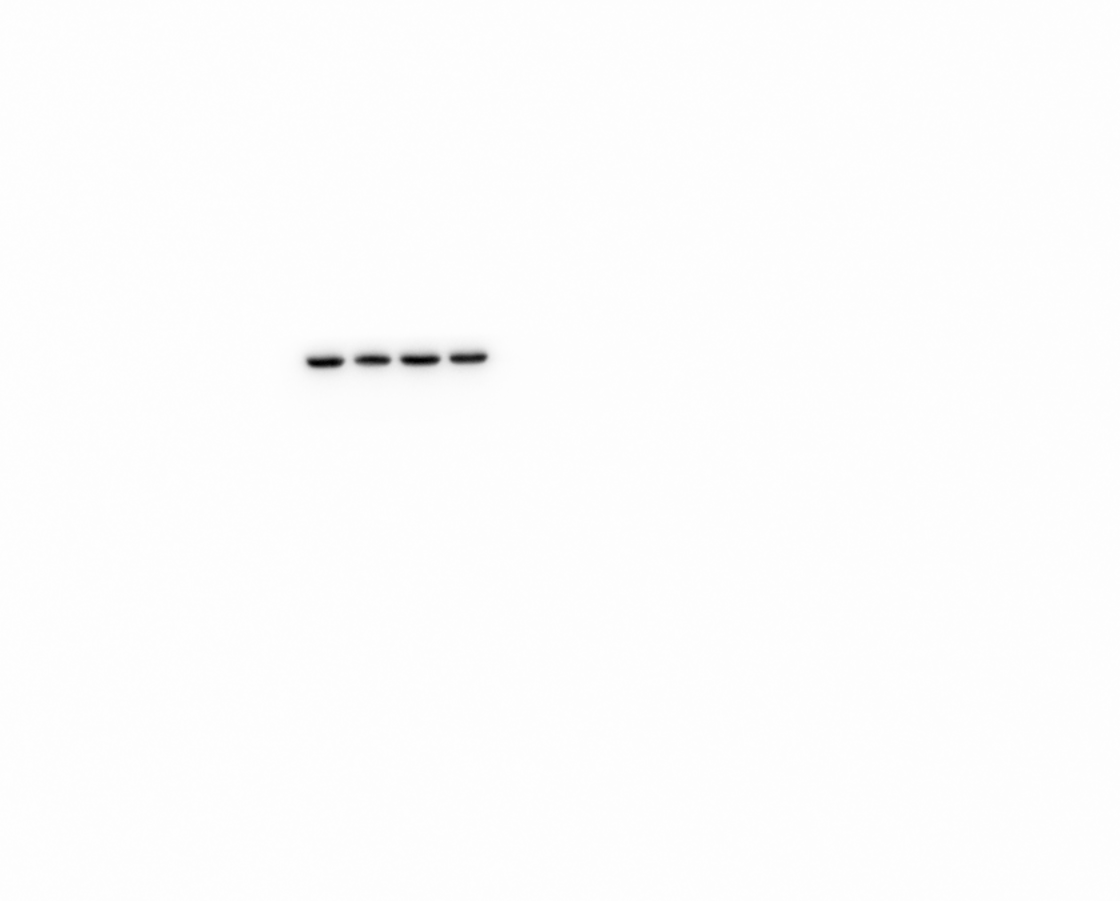


**Fig.S5 G**

ΔNp63α/γ


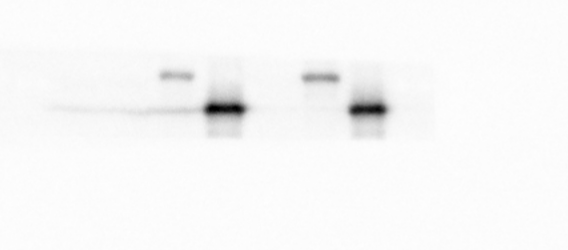


GAPDH


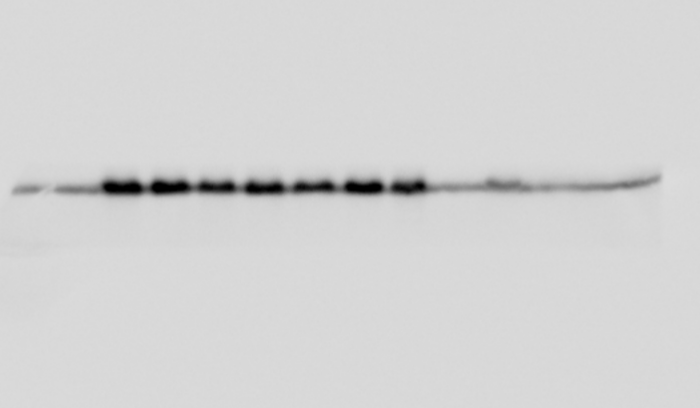


**Fig.S6 A**

P-ERK


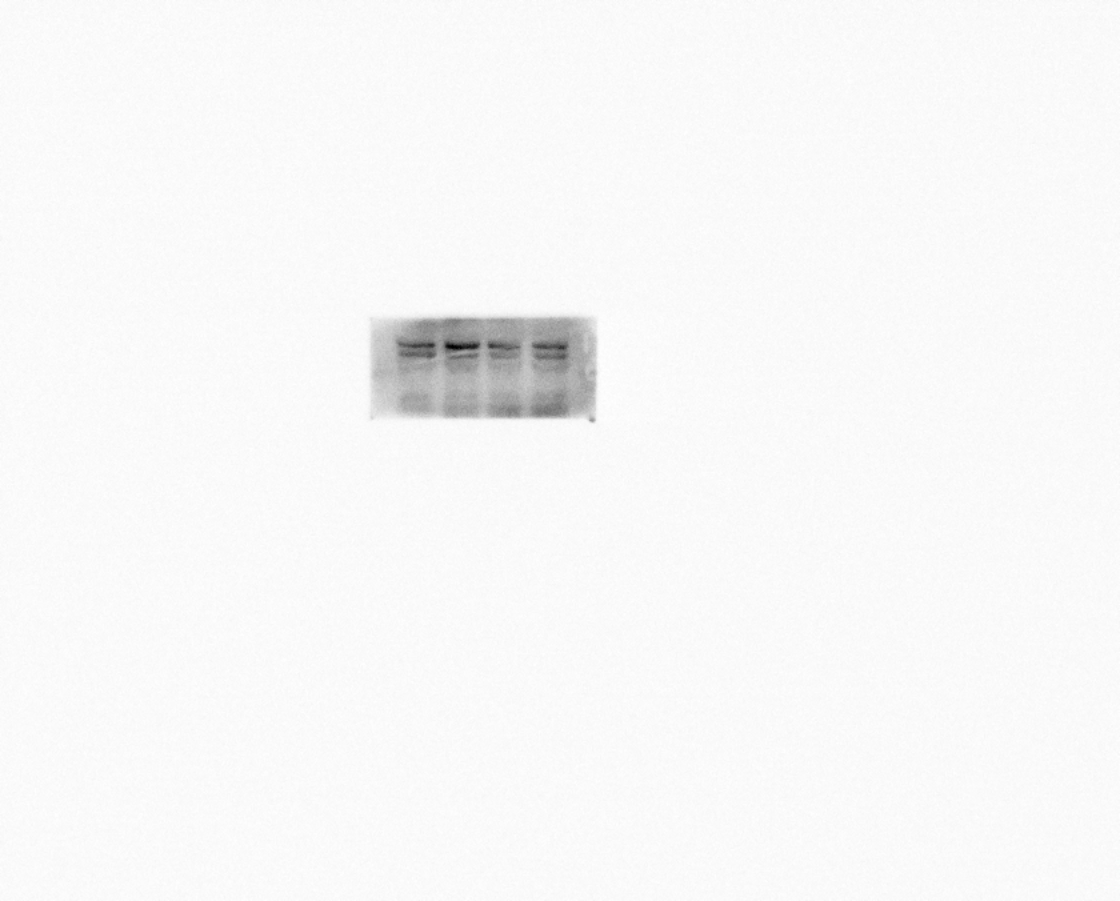


ERK


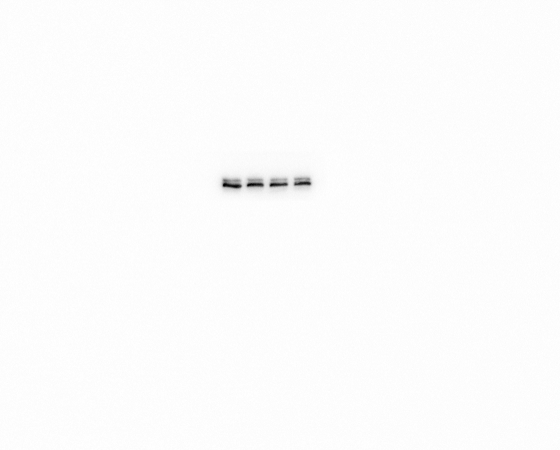


GAPDH


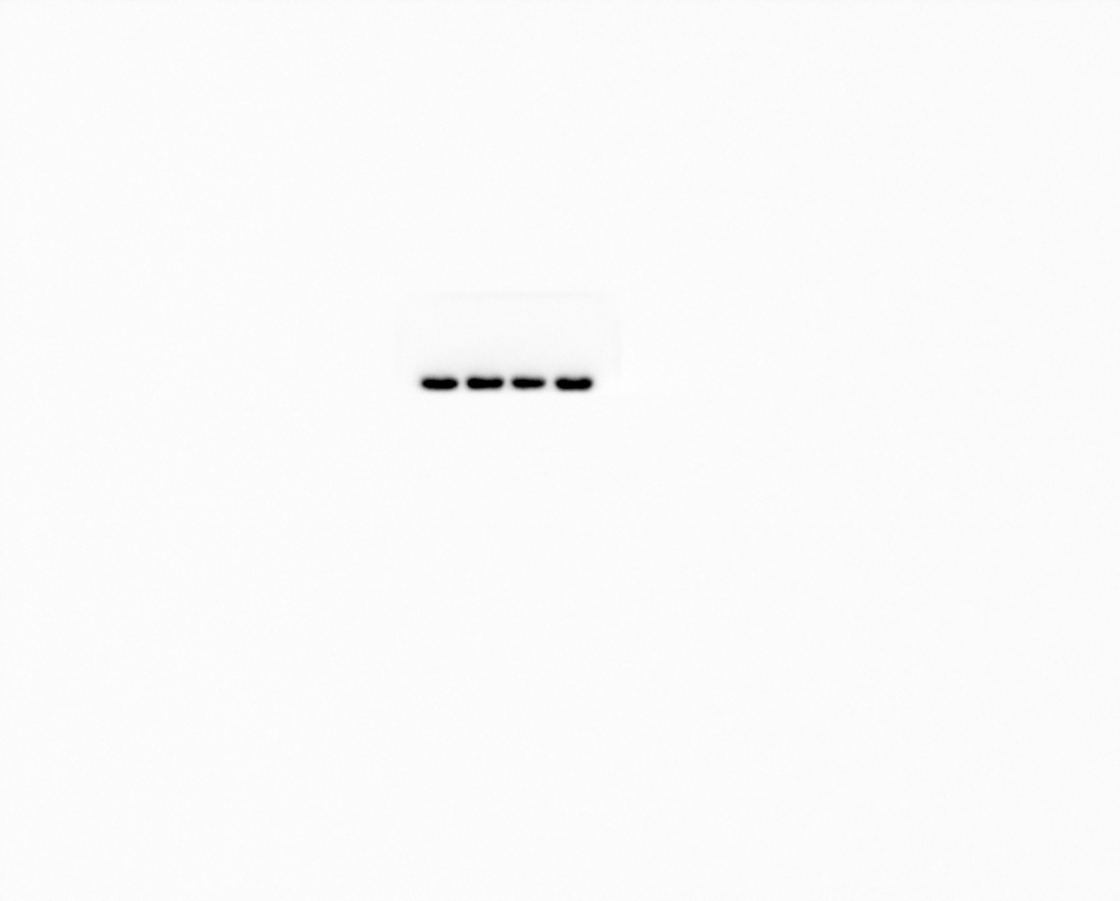


**Fig.S6 B**

ΔNp63α


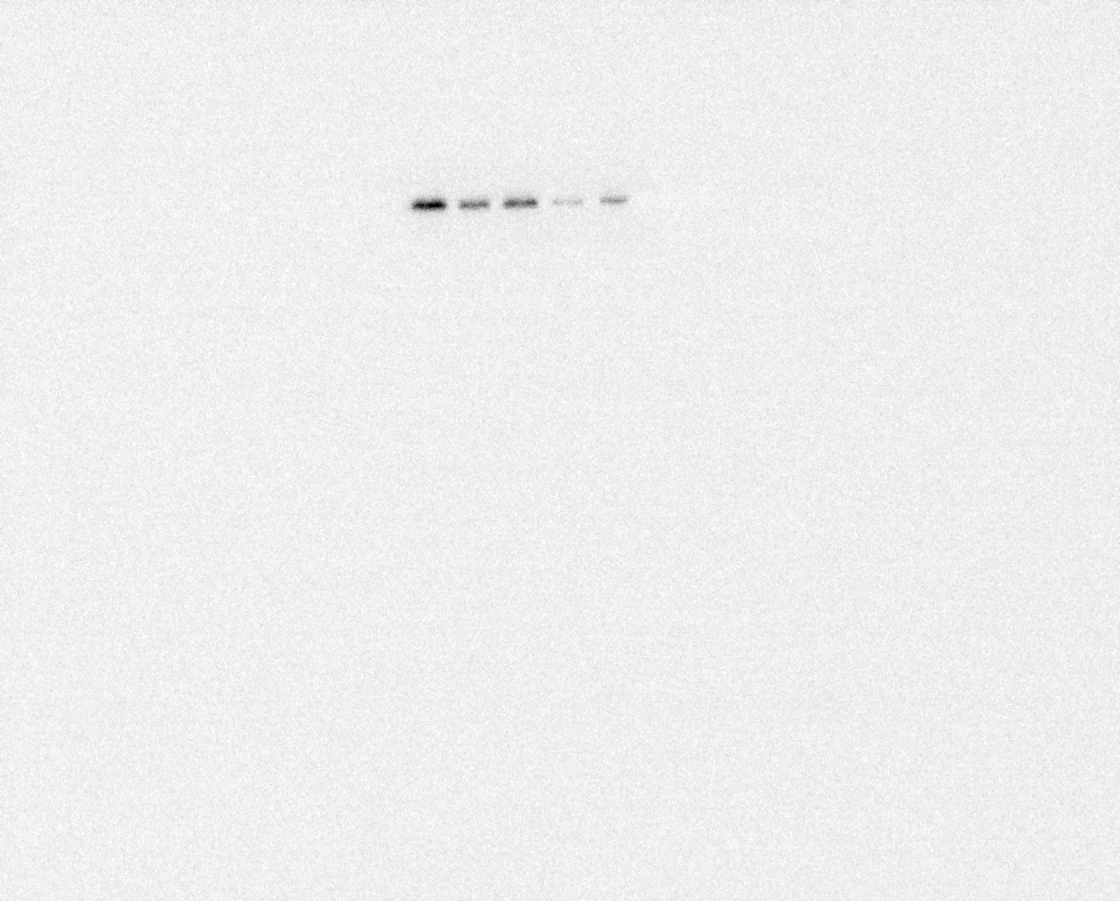


GAPDH


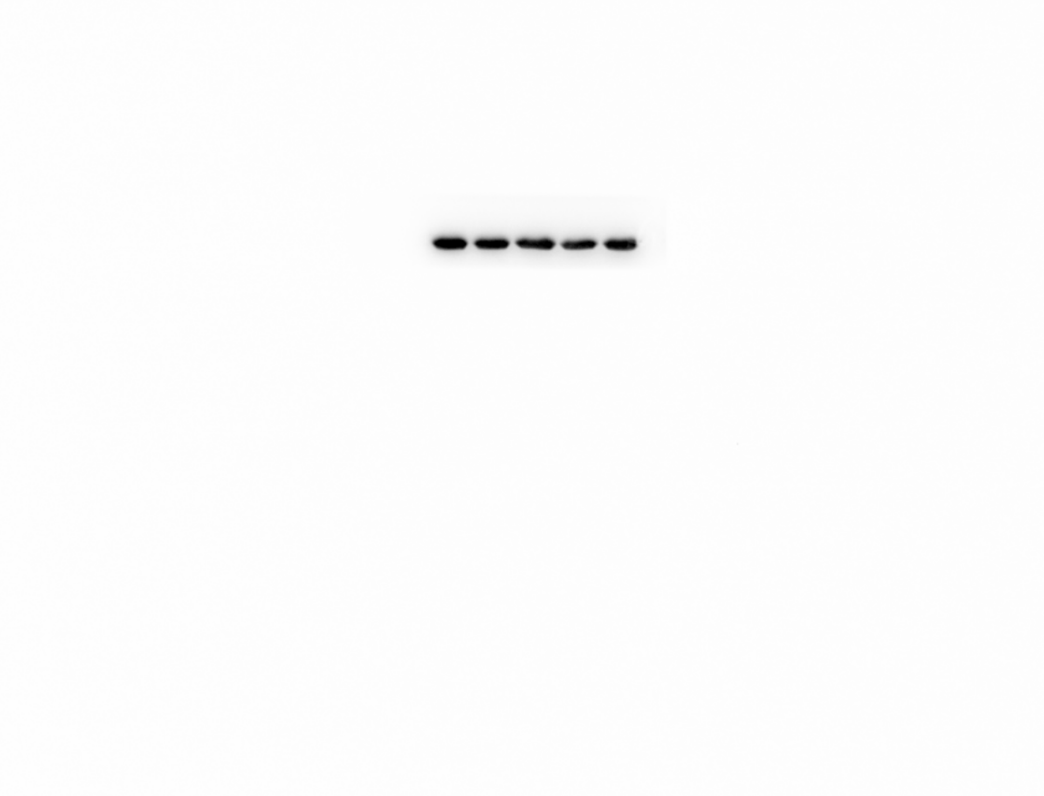


**Fig.S6 G**

ΔNp63α


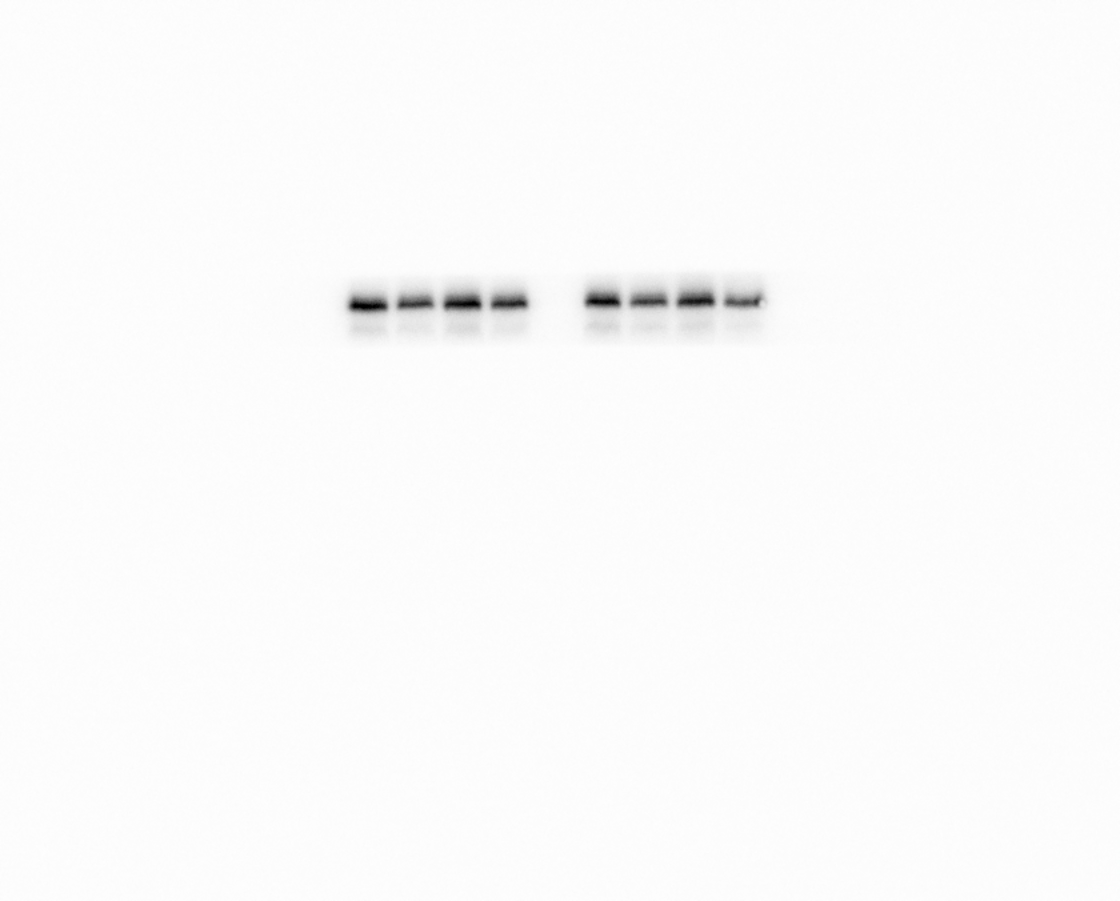


P-ERK


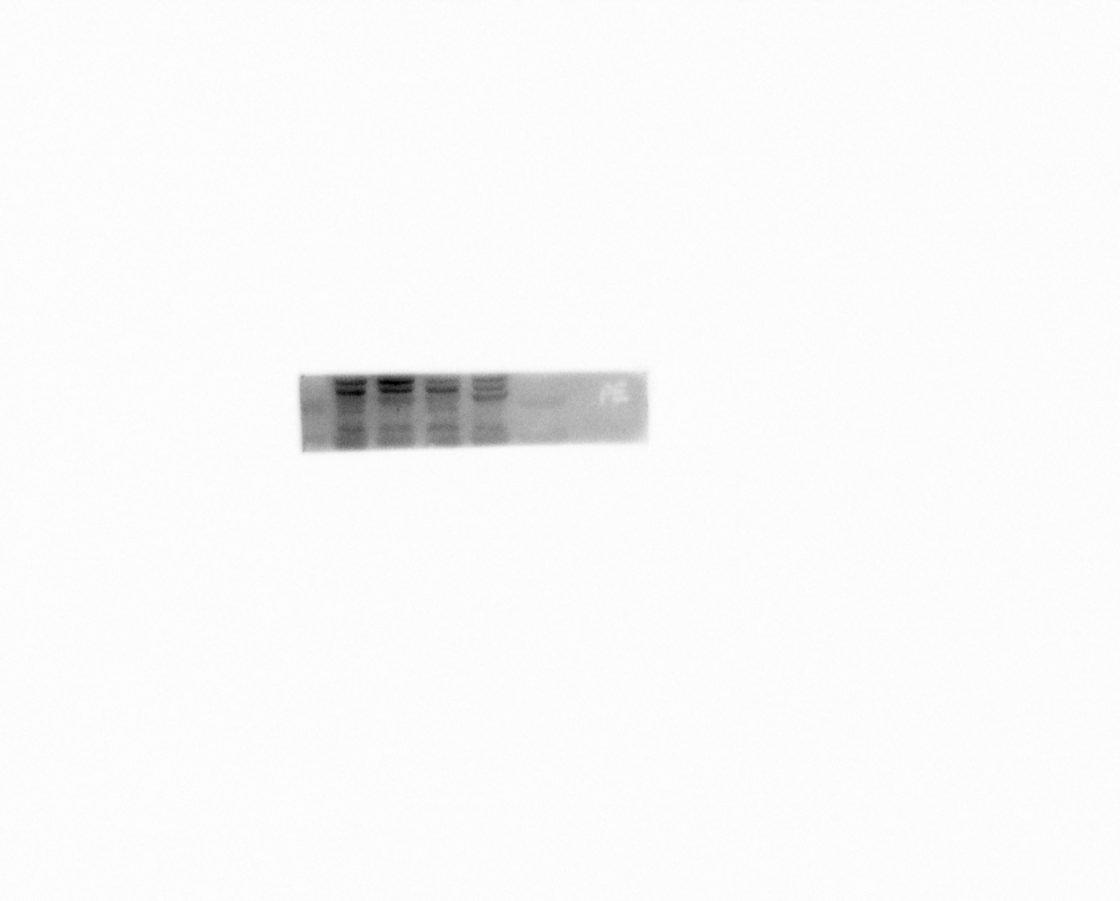


ERK


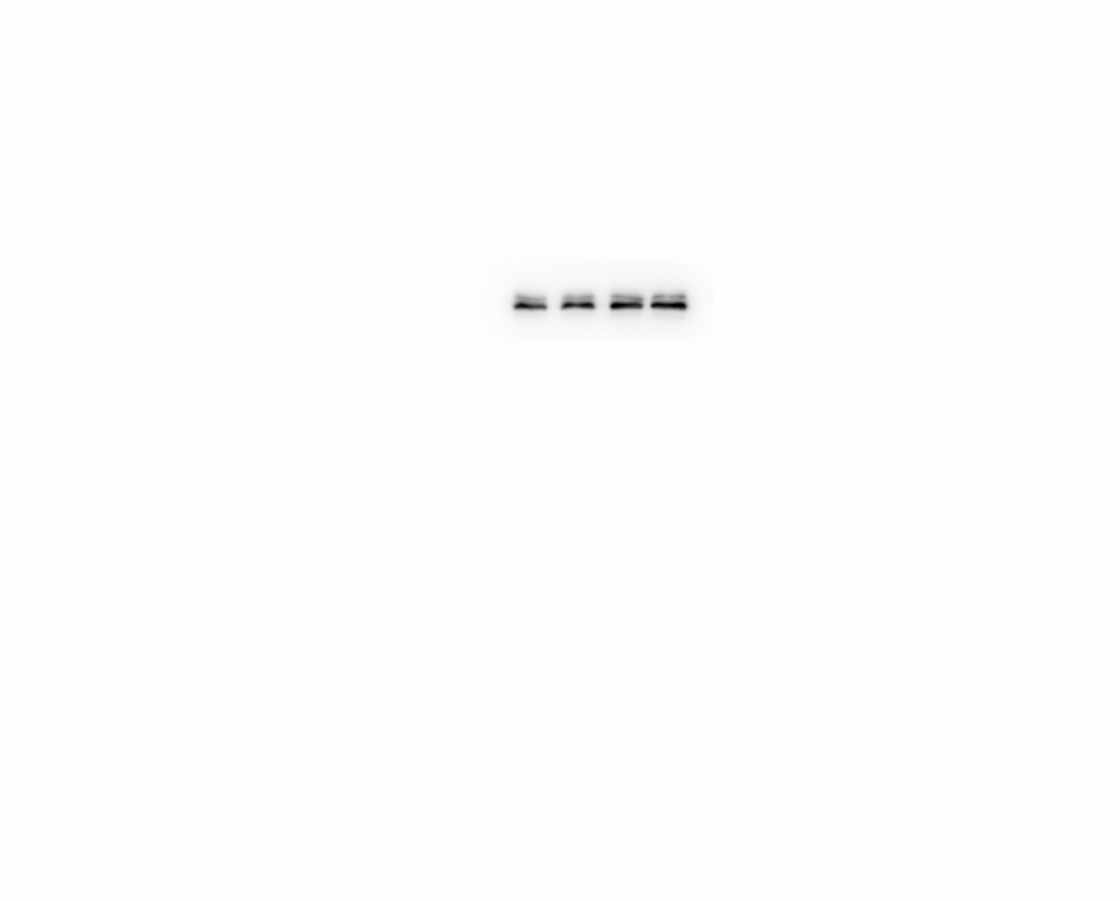


GAPDH


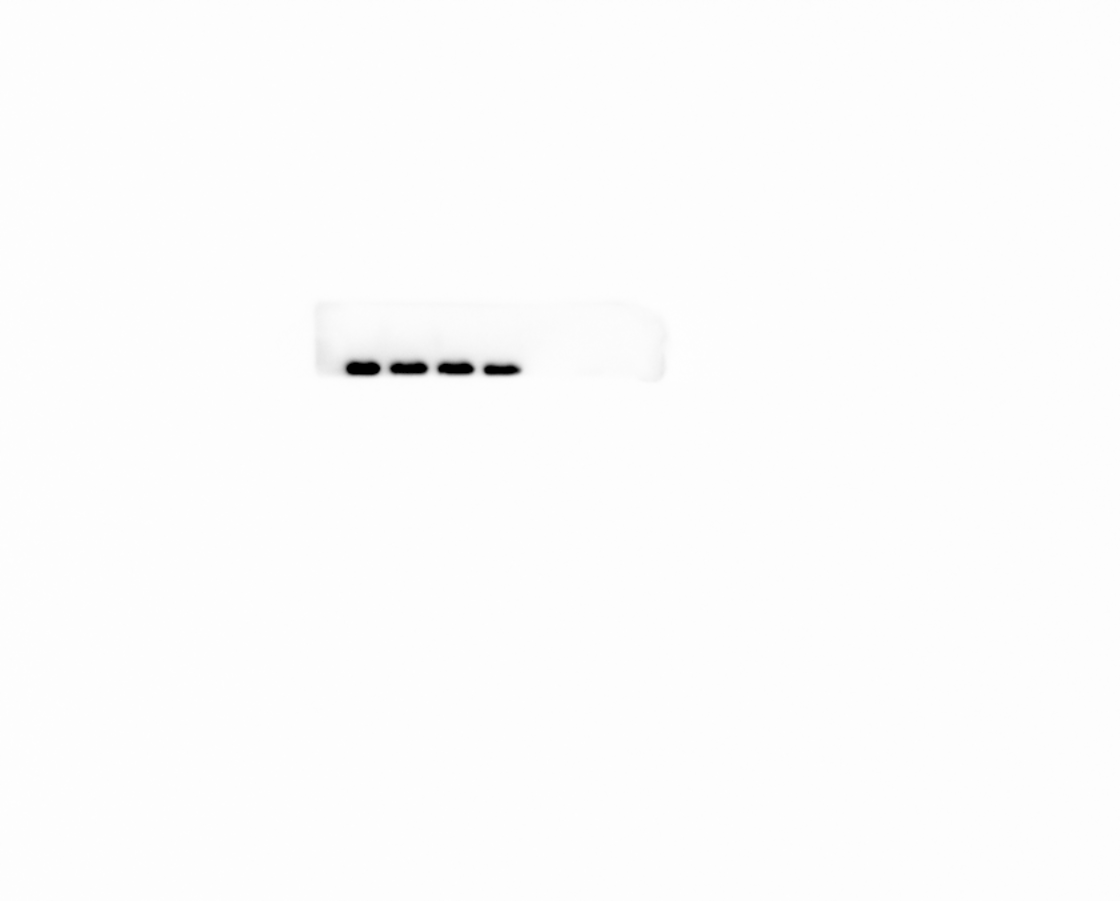


**Fig.S6 I**

ΔNp63α


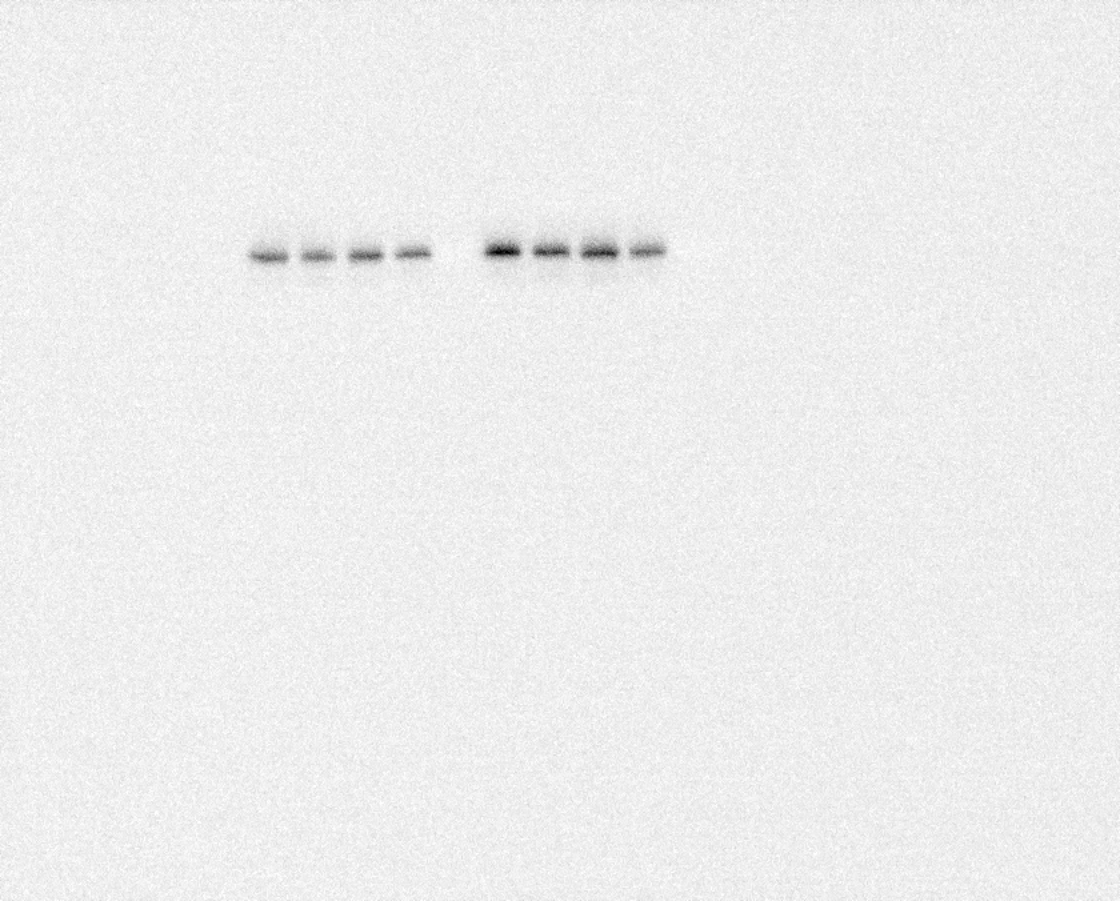


P-ERK


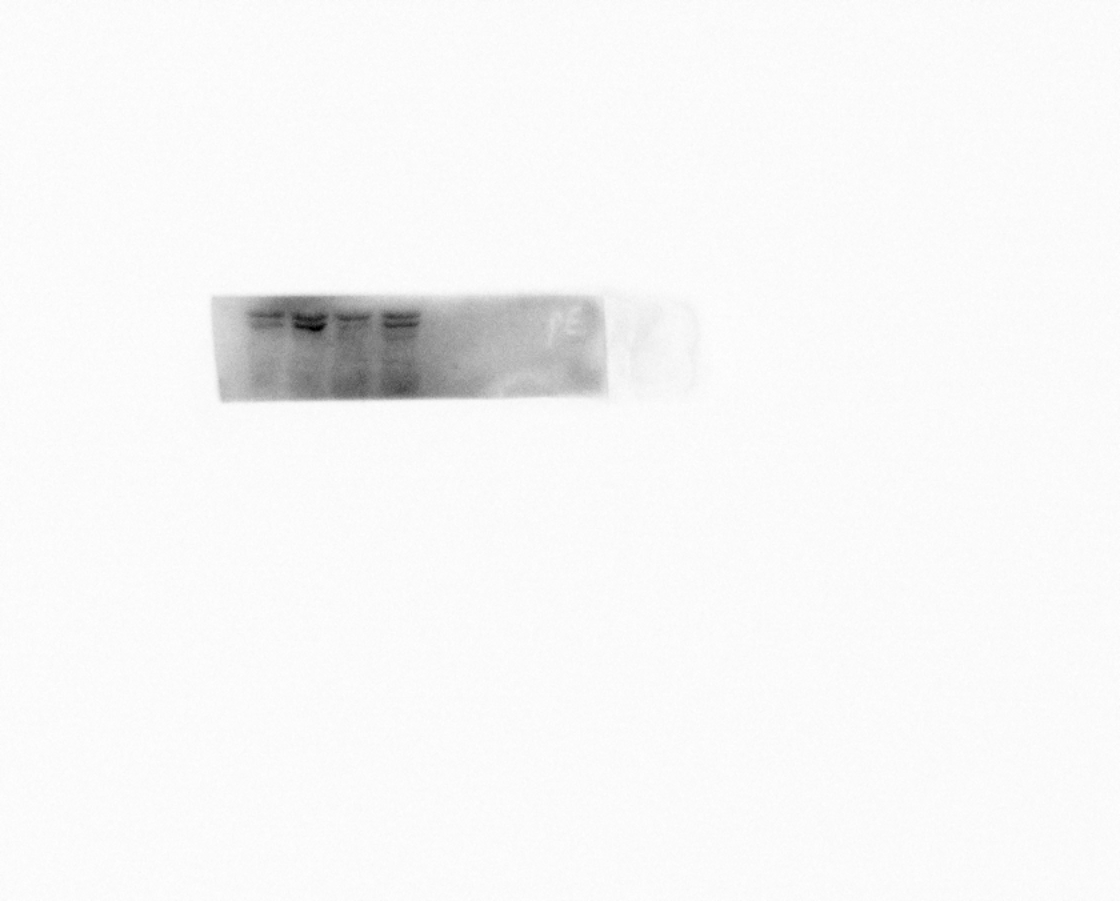


ERK


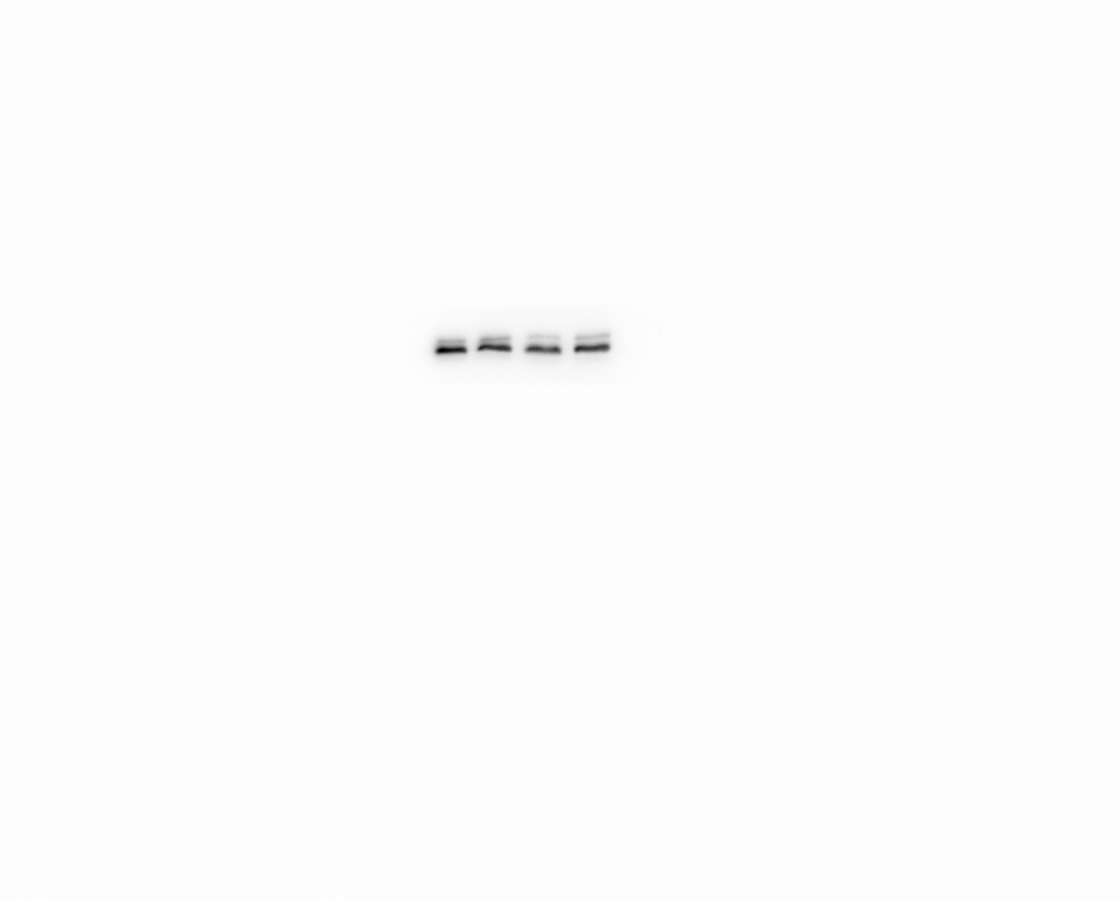


GAPDH


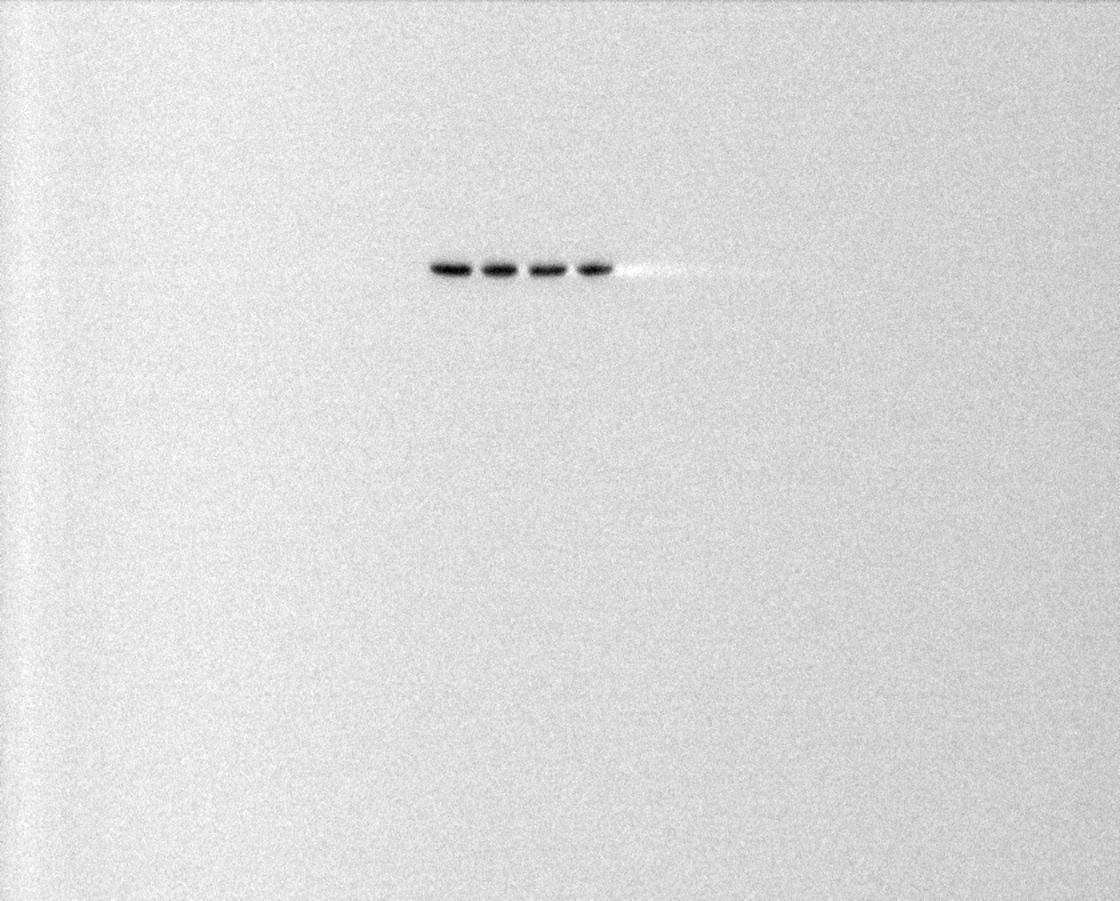


**Fig.S6 J**

ΔNp63α


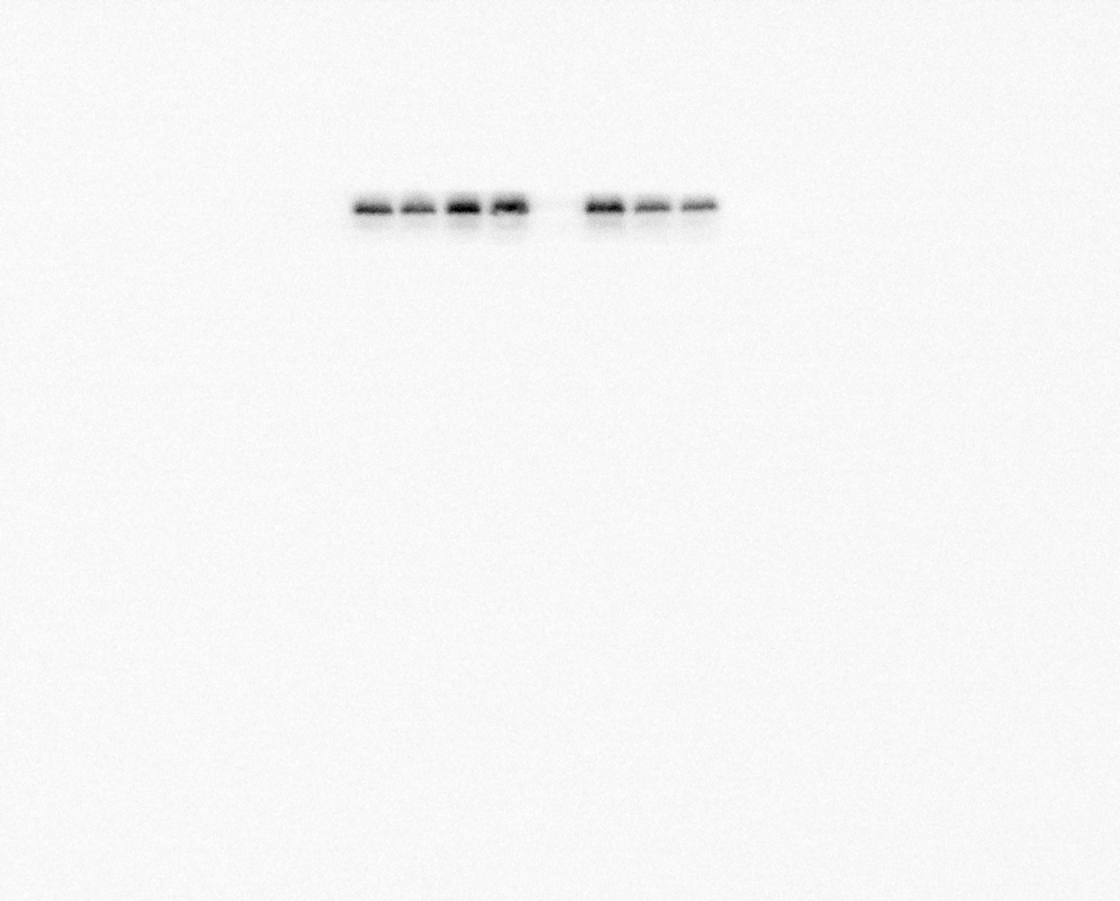


GAPDH


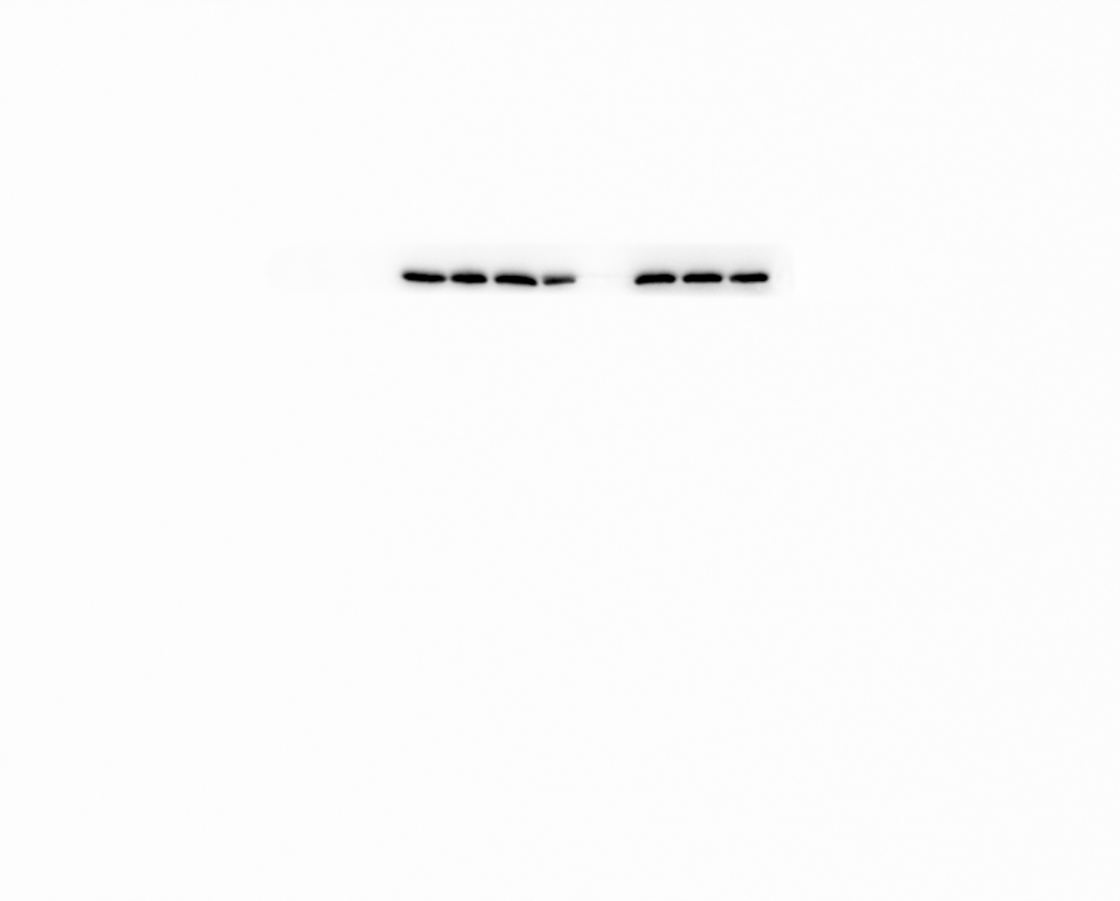

Supplement: Supplementary file 2 [file e74b401d8d996663fdd768e6.docx]
